# Supplementary material for: Atomic structure of the human herpesvirus 6B capsid and capsid-associated tegument complexes
Source: PubMed Central journal article supplement (PMC6877594; doi:10.1038/s41467-019-13064-x), 2019-11-25
Supplement: 41467_2019_13064_MOESM1_ESM.pdf [file 41467_2019_13064_MOESM1_ESM.pdf]

## **Supporting Information**

### **Atomic structure of the Human Herpesvirus 6B Capsid and Capsid-Associated Tegument Complexes**

Yibo Zhang, Wei Liu et al.

#### **List of Content**

Supplementary Figures 1-14

Supplementary Table 1-3

Supplementary References

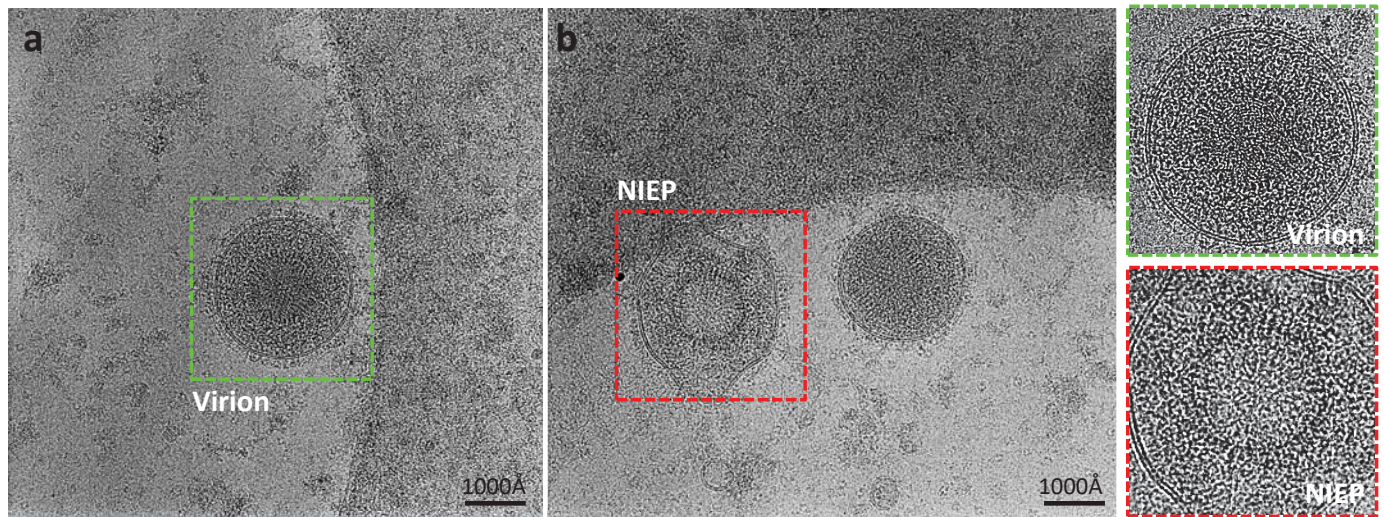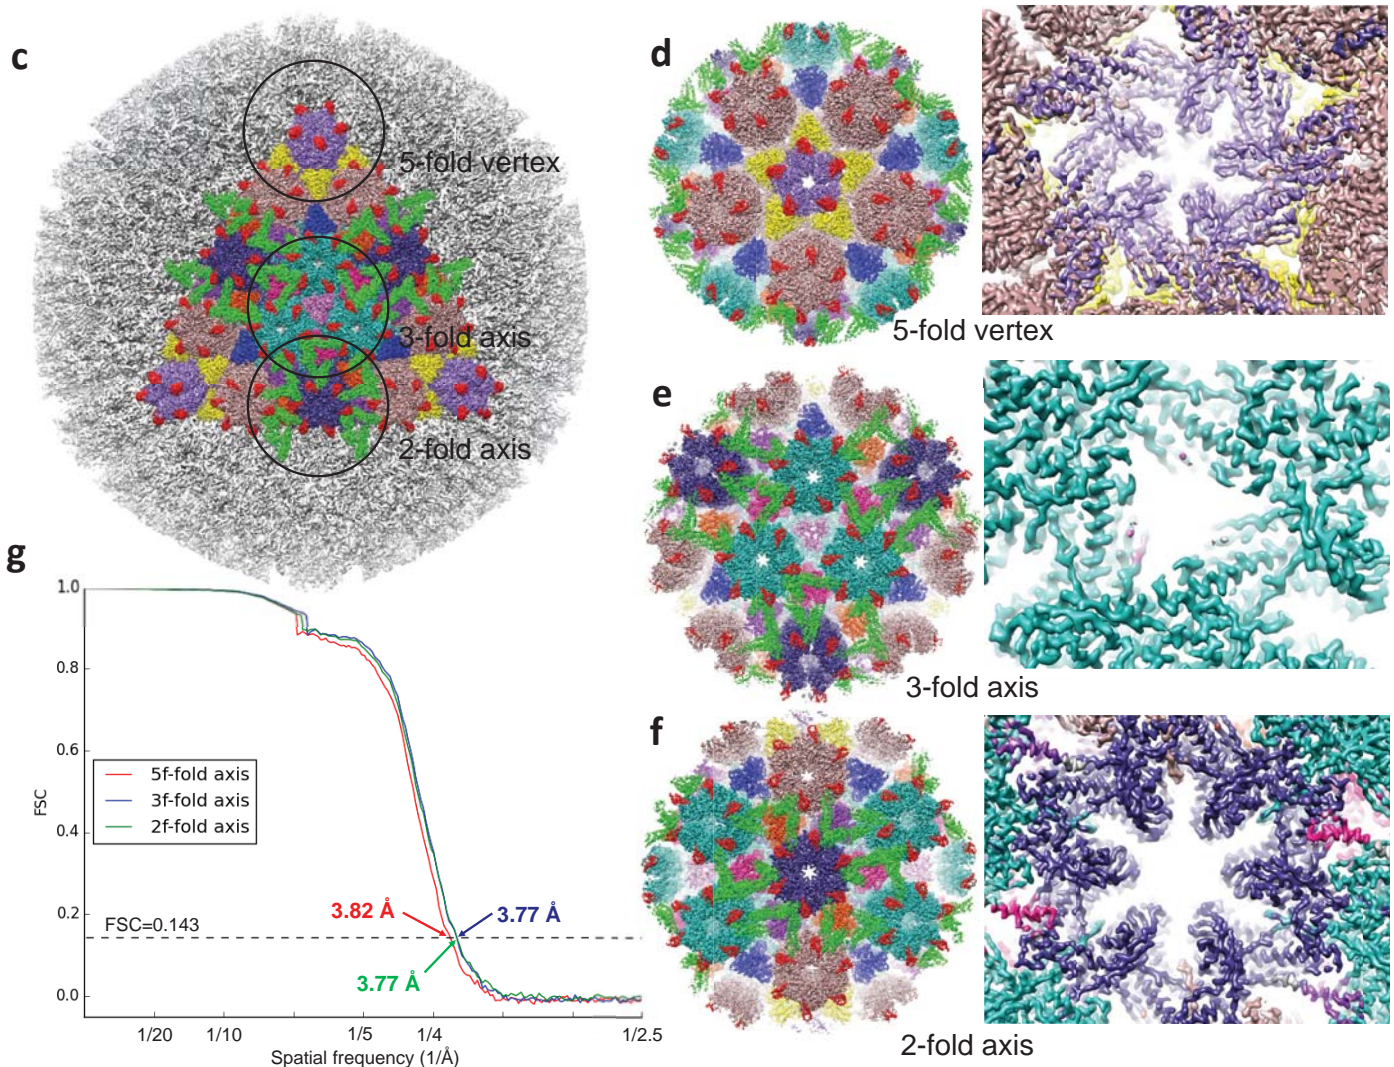

**Supplementary Figure 1. CryoEM images of HHV-6B particles, sub-particle reconstructions, and resolution assessment.**

(a-b) Representative images recorded on K2 camera indicate a low concentration of HHV-6B sample and show the HHV-6B virion (green) and non-infectious enveloped particle (NIEP, red). (c-f) The icosahedral reconstruction in Fig 1b is reshown (c) with one triangular facet in color; the regions (referred to as “sub-particles”) surrounding a 5-fold, 3-fold, and 2-fold axis are circled. A total of 77,316 5-fold sub-particles, 128,860 3-fold sub-particles, and 196,290 2-fold sub-particles were boxed out from original particle images and refined, yielding improved resolutions for the 5-fold sub-particle (d), 3-fold sub-particle (e), and 2-fold sub-particle (f). The enlarged views from inside these sub-particle reconstructions (right panels) show  $\alpha$ -helices and  $\beta$ -strands with well-resolved side chain densities. (g) Gold-standard Fourier shell correlation (FSC) curves of the sub-particle reconstructions, indicating the resolutions of sub-particle reconstructions at the 5-fold (red), 3-fold (blue), and 2-fold (green) axes are 3.82 Å, 3.77 Å, and 3.77 Å, respectively, based on the 0.143 FSC criterion.

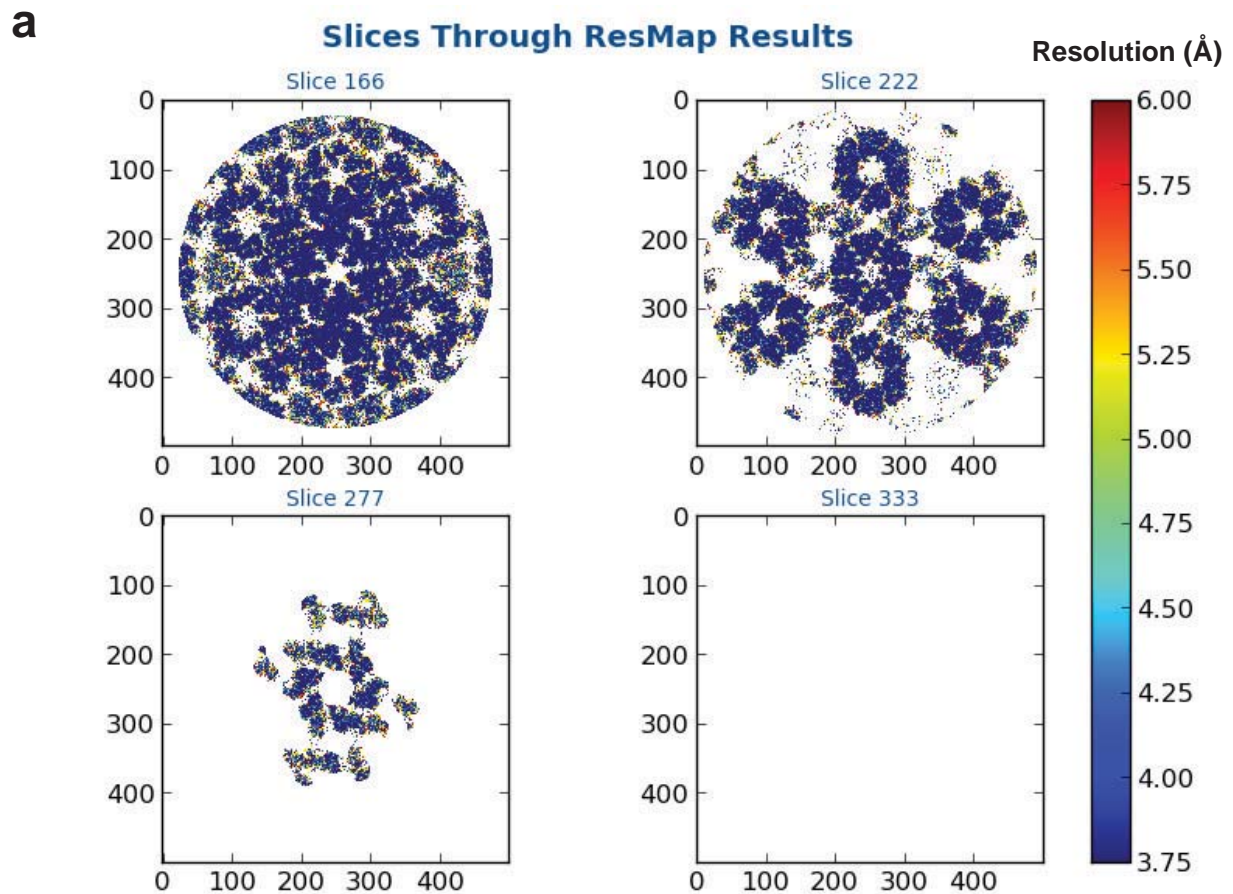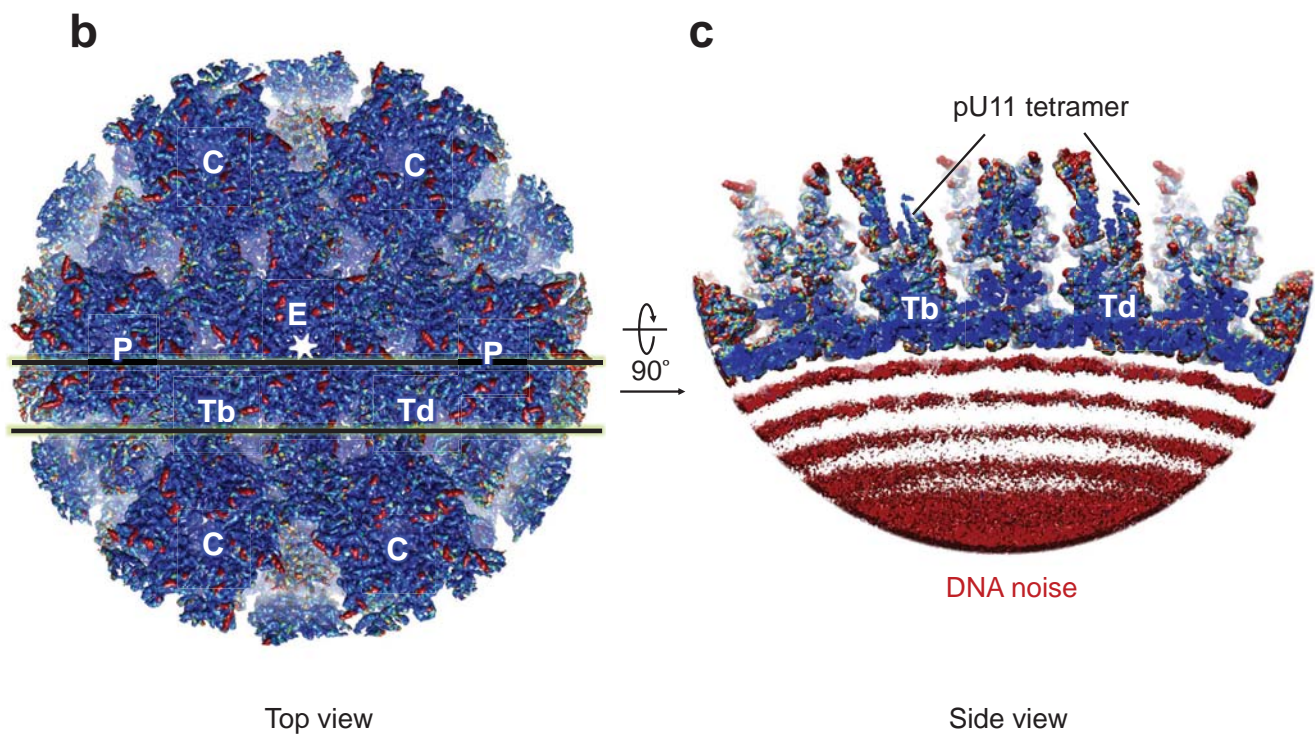

**Supplementary Figure 2. Local resolution assessment for the 2-fold sub-particle reconstruction.**

Representative slices (**a**) and surface views (**b**, **c**) of the sub-particle reconstruction showing local resolution heat maps generated by *ResMap*<sup>1</sup>. The side view (**c**) shows the density slab demarked by the two horizontal lines in the top view (**b**). Color scheme for local resolutions is shown in the color bar. Hexons C, E, P and triplexes Tb, Td are labeled.

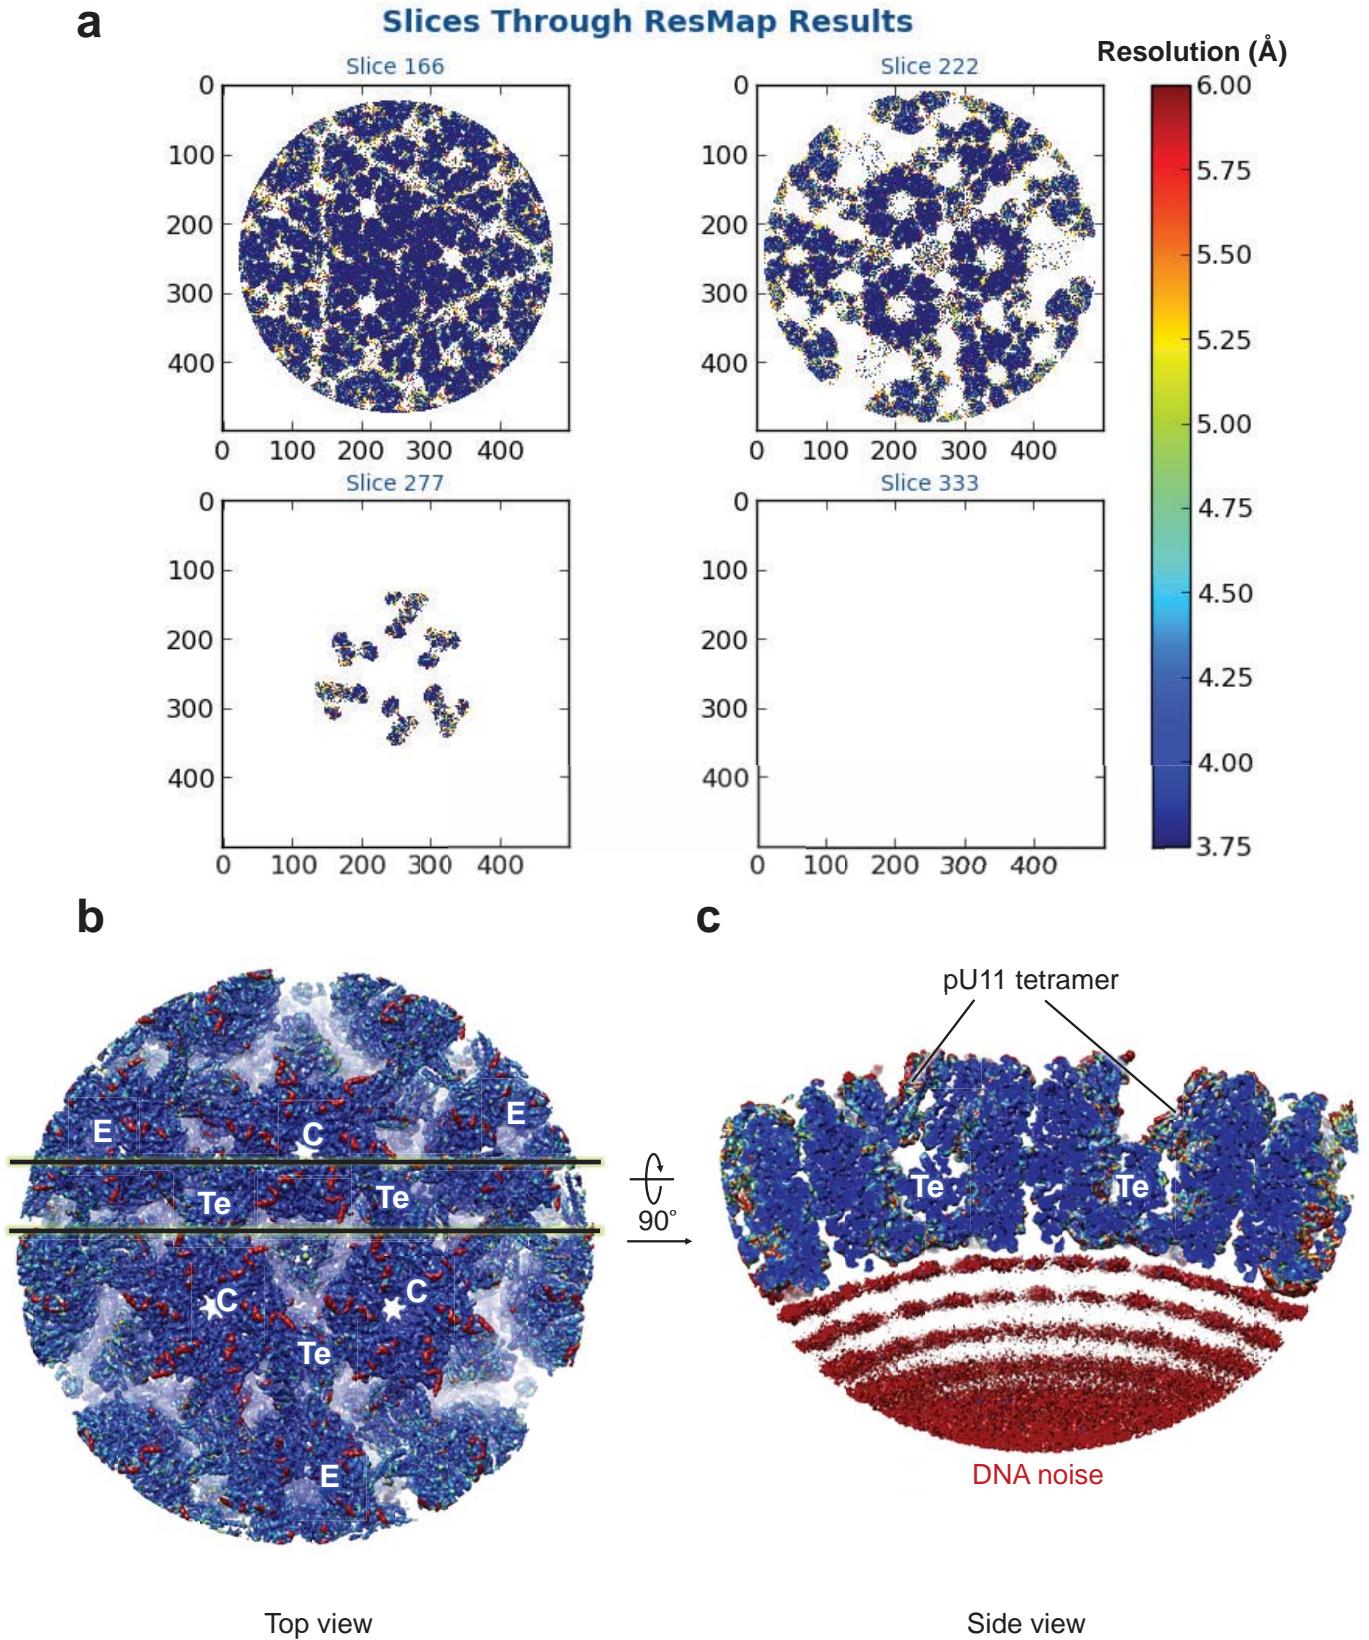

**Supplementary Figure 3. Local resolution assessment for the 3-fold sub-particle reconstruction.**

Representative slices (a) and surface views (b, c) of the sub-particle reconstruction showing local resolution heat maps generated by *ResMap*<sup>1</sup>. The side view (c) shows the density slab demarcated by the two horizontal lines in the top view (b). Color scheme for local resolutions is shown in the color bar. Hexons C, E and triplexes Te are labeled.

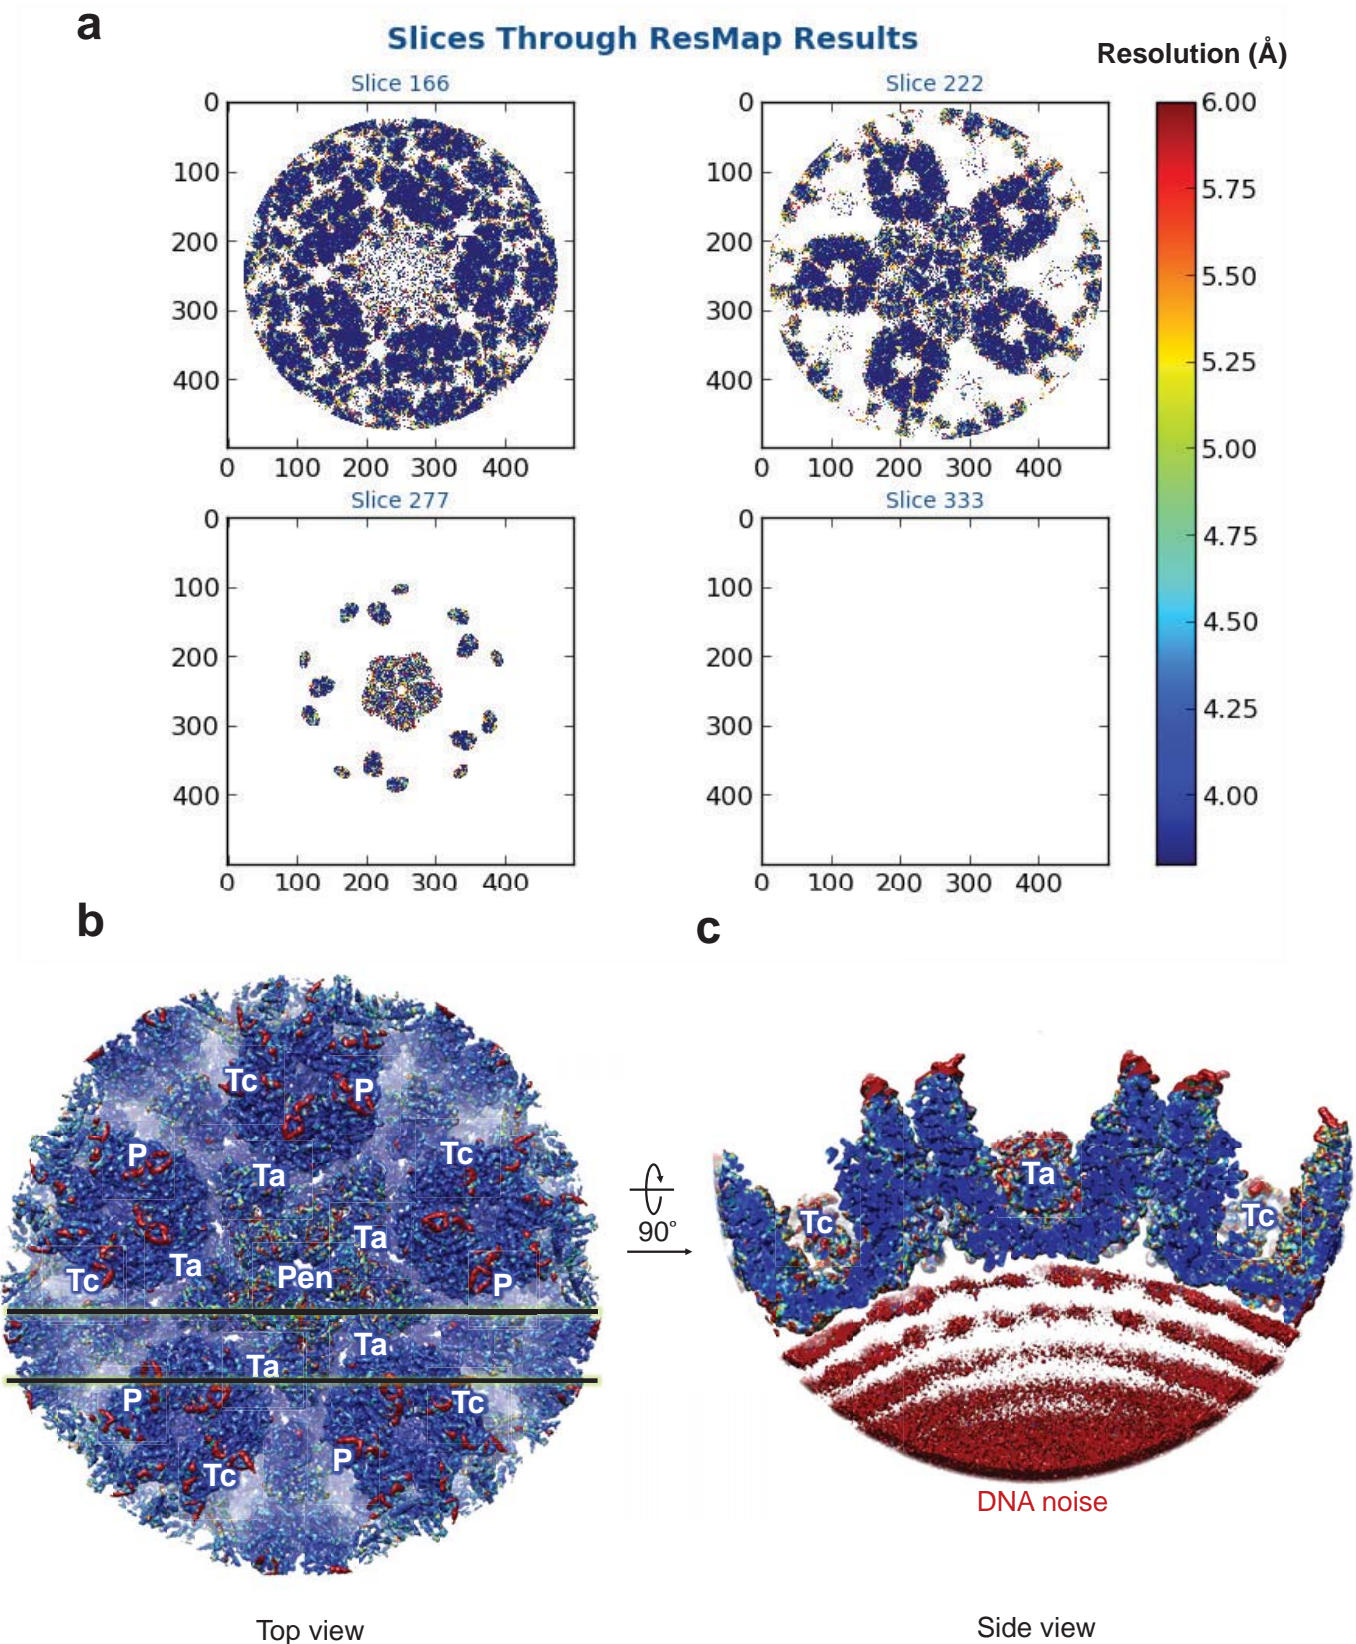

**Supplementary Figure 4. Local resolution assessment for the 5-fold sub-particle reconstruction.**

Representative slices (**a**) and surface views (**b**, **c**) of the sub-particle reconstruction, showing local resolution heat maps generated by *ResMap*<sup>1</sup>. The side view (**c**) shows the density slab demarked by the two horizontal lines in the top view (**b**). Color scheme for local resolutions is shown in the color bar. Penton, hexons P, and triplexes Ta, Tc are labeled.

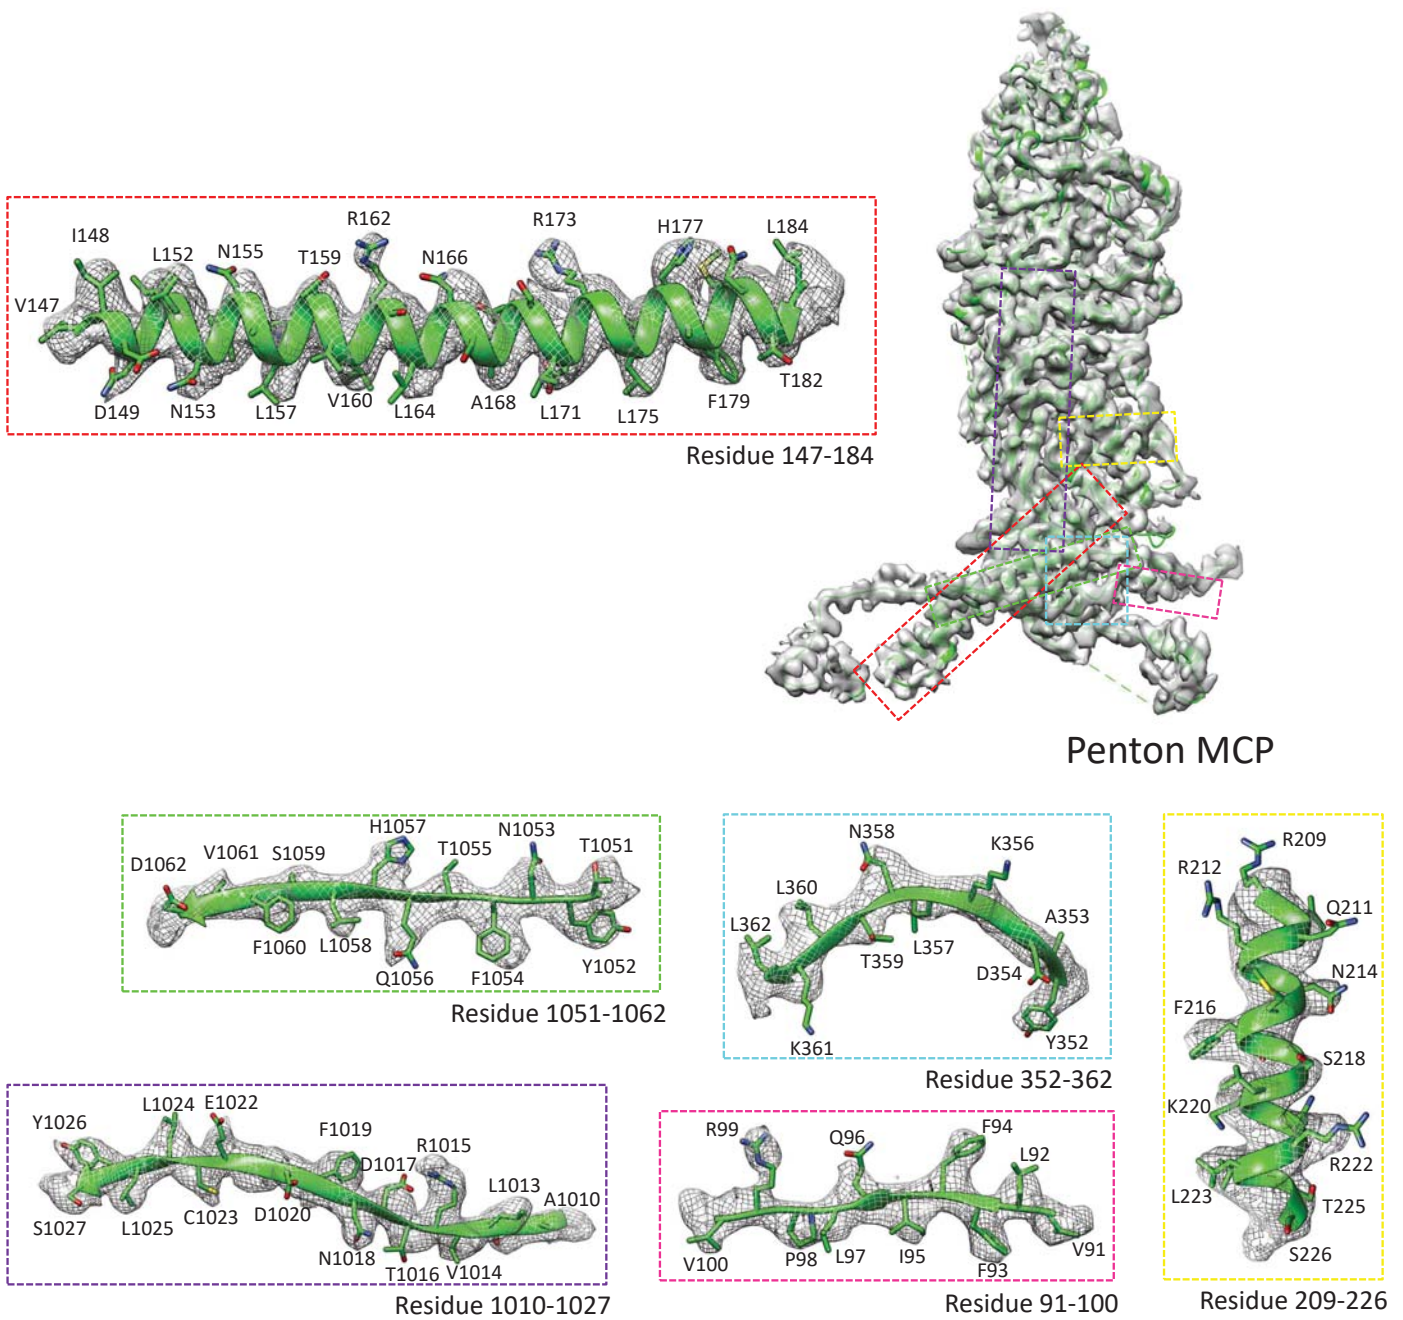

**Supplementary Figure 5. Density map and atomic model of a Penton MCP.**

The density map (gray) of a penton MCP (segmented out from the 5-fold axis sub-particle reconstruction) at 3.82 Å resolution is superposed with its atomic model (ribbon). Boxed regions are enlarged, with density shown as gray mesh and atomic models as ribbon/sticks, in boxes with corresponding color edges.

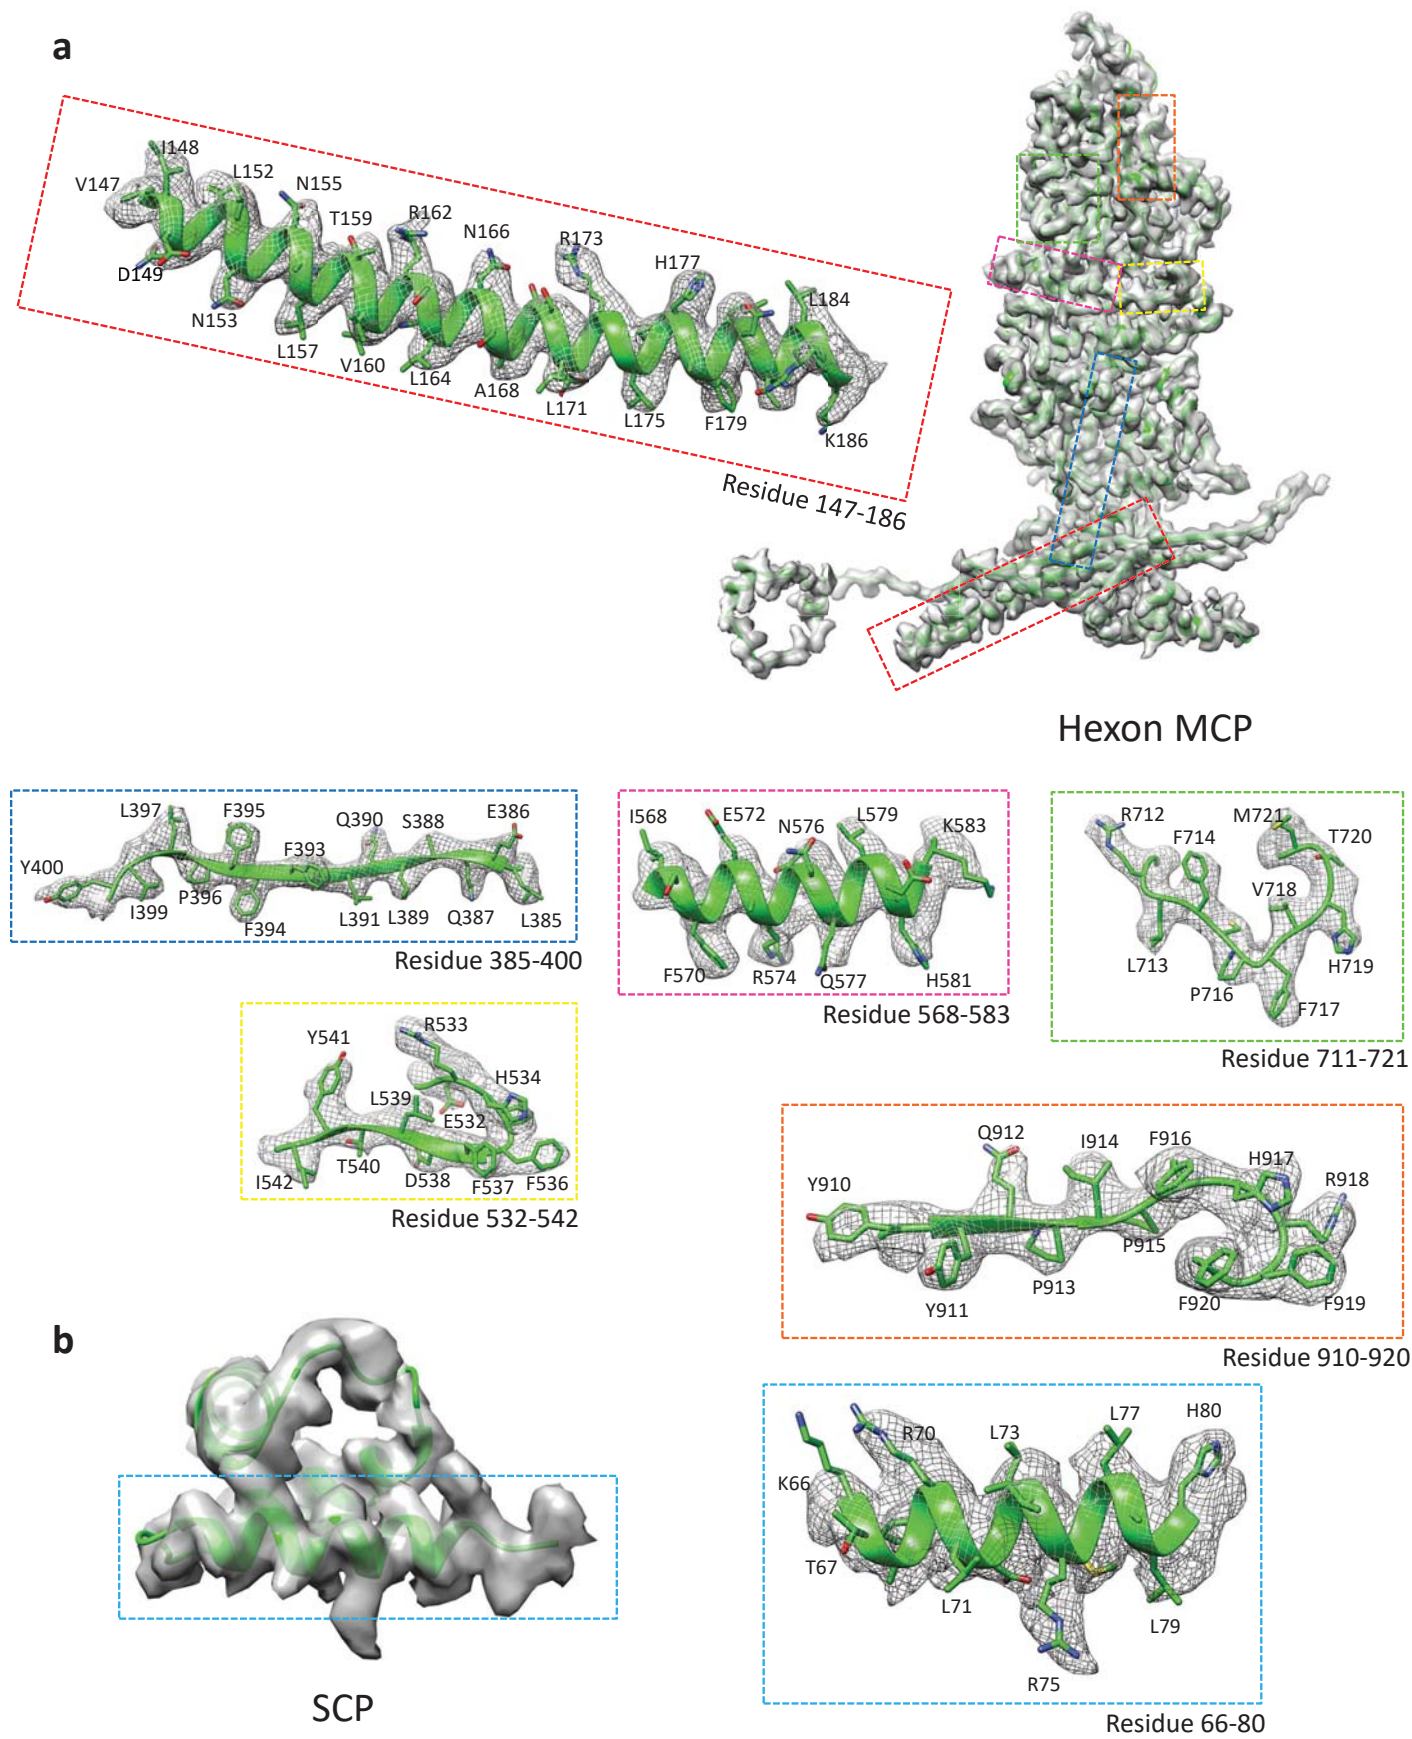

**Supplementary Figure 6. Density map and atomic model of a hexon MCP and a SCP monomer.**

(a-b) The density map (gray) of a hexon MCP (e.g., MCP E2) (a) and a SCP (e.g., SCP C6) (b) (segmented out from the 3-fold axis sub-particle reconstruction) at 3.77 Å resolution is superposed with the atomic model (ribbon). Boxed regions are enlarged, with density shown as gray mesh and atomic models as ribbon/sticks, in boxes with corresponding color edges.

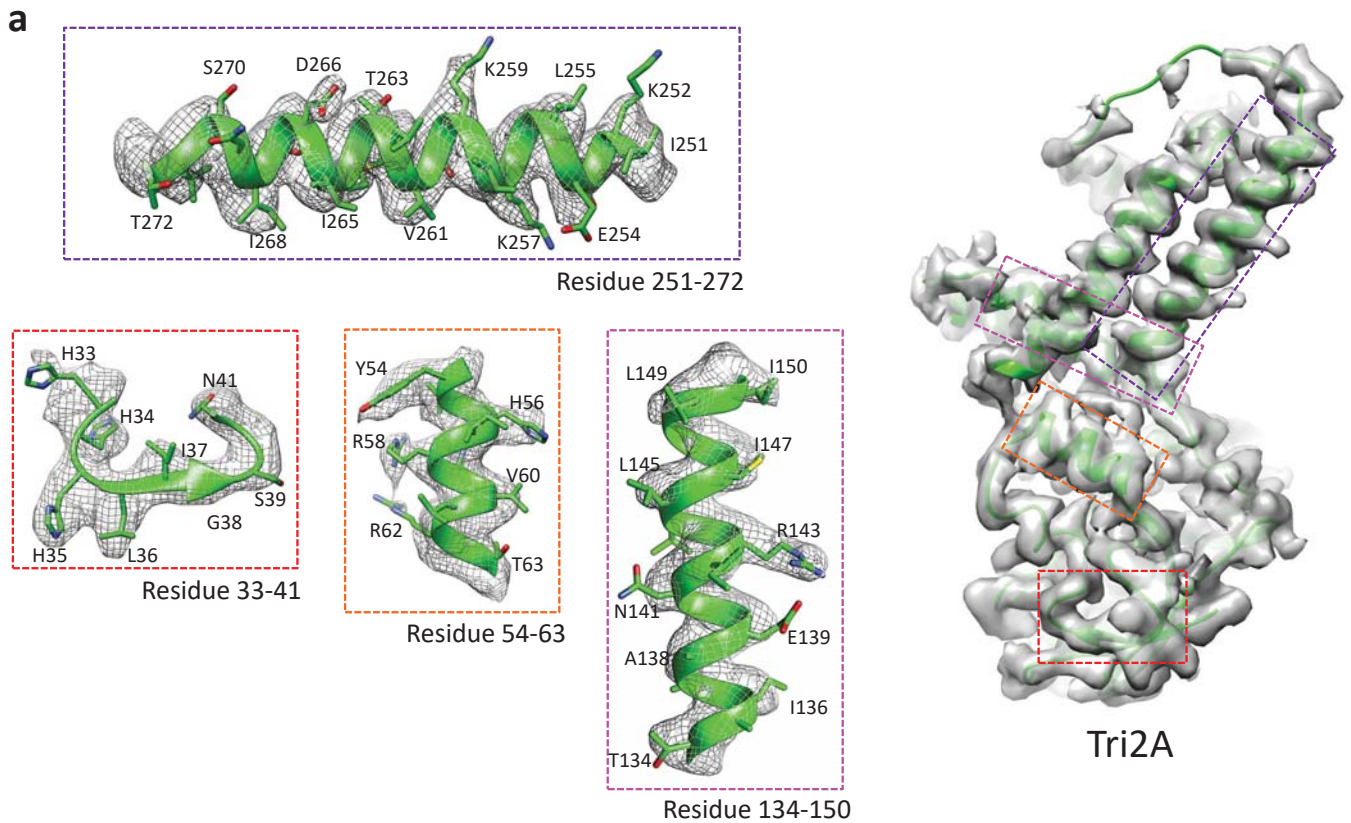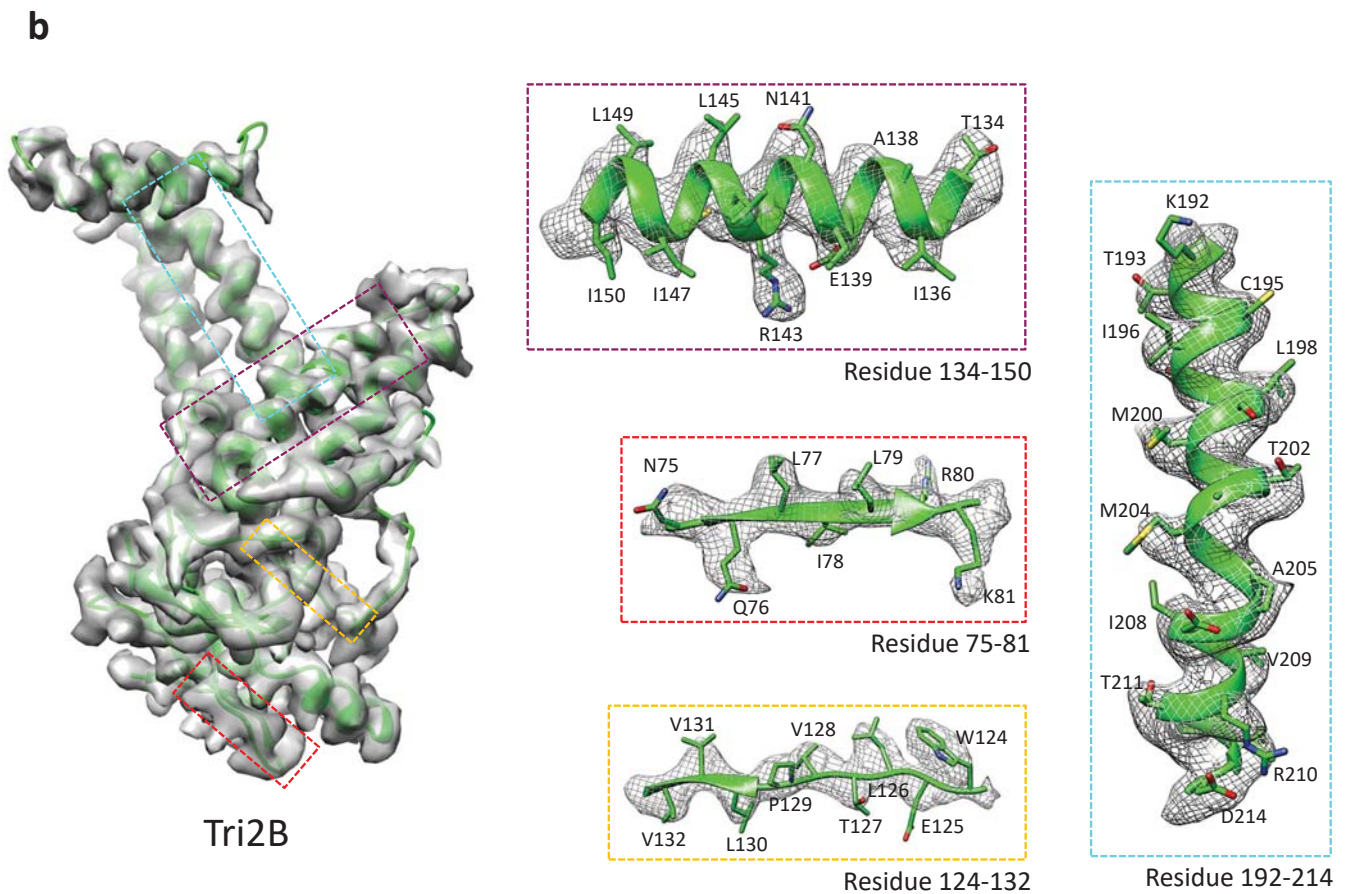

**Supplementary Figure 7. Density maps and atomic models of a Tri2A and a Tri2B monomer.**

(a-b) The density maps (gray) of a Tri2A (a) and a Tri2B (b) (segmented out from triplex Tb of the 3-fold axis sub-particle reconstruction) at 3.77 Å are superposed with their atomic models (ribbon). Boxed regions are enlarged, with density shown as gray mesh and atomic models as ribbon/sticks, in boxes with corresponding color edges.



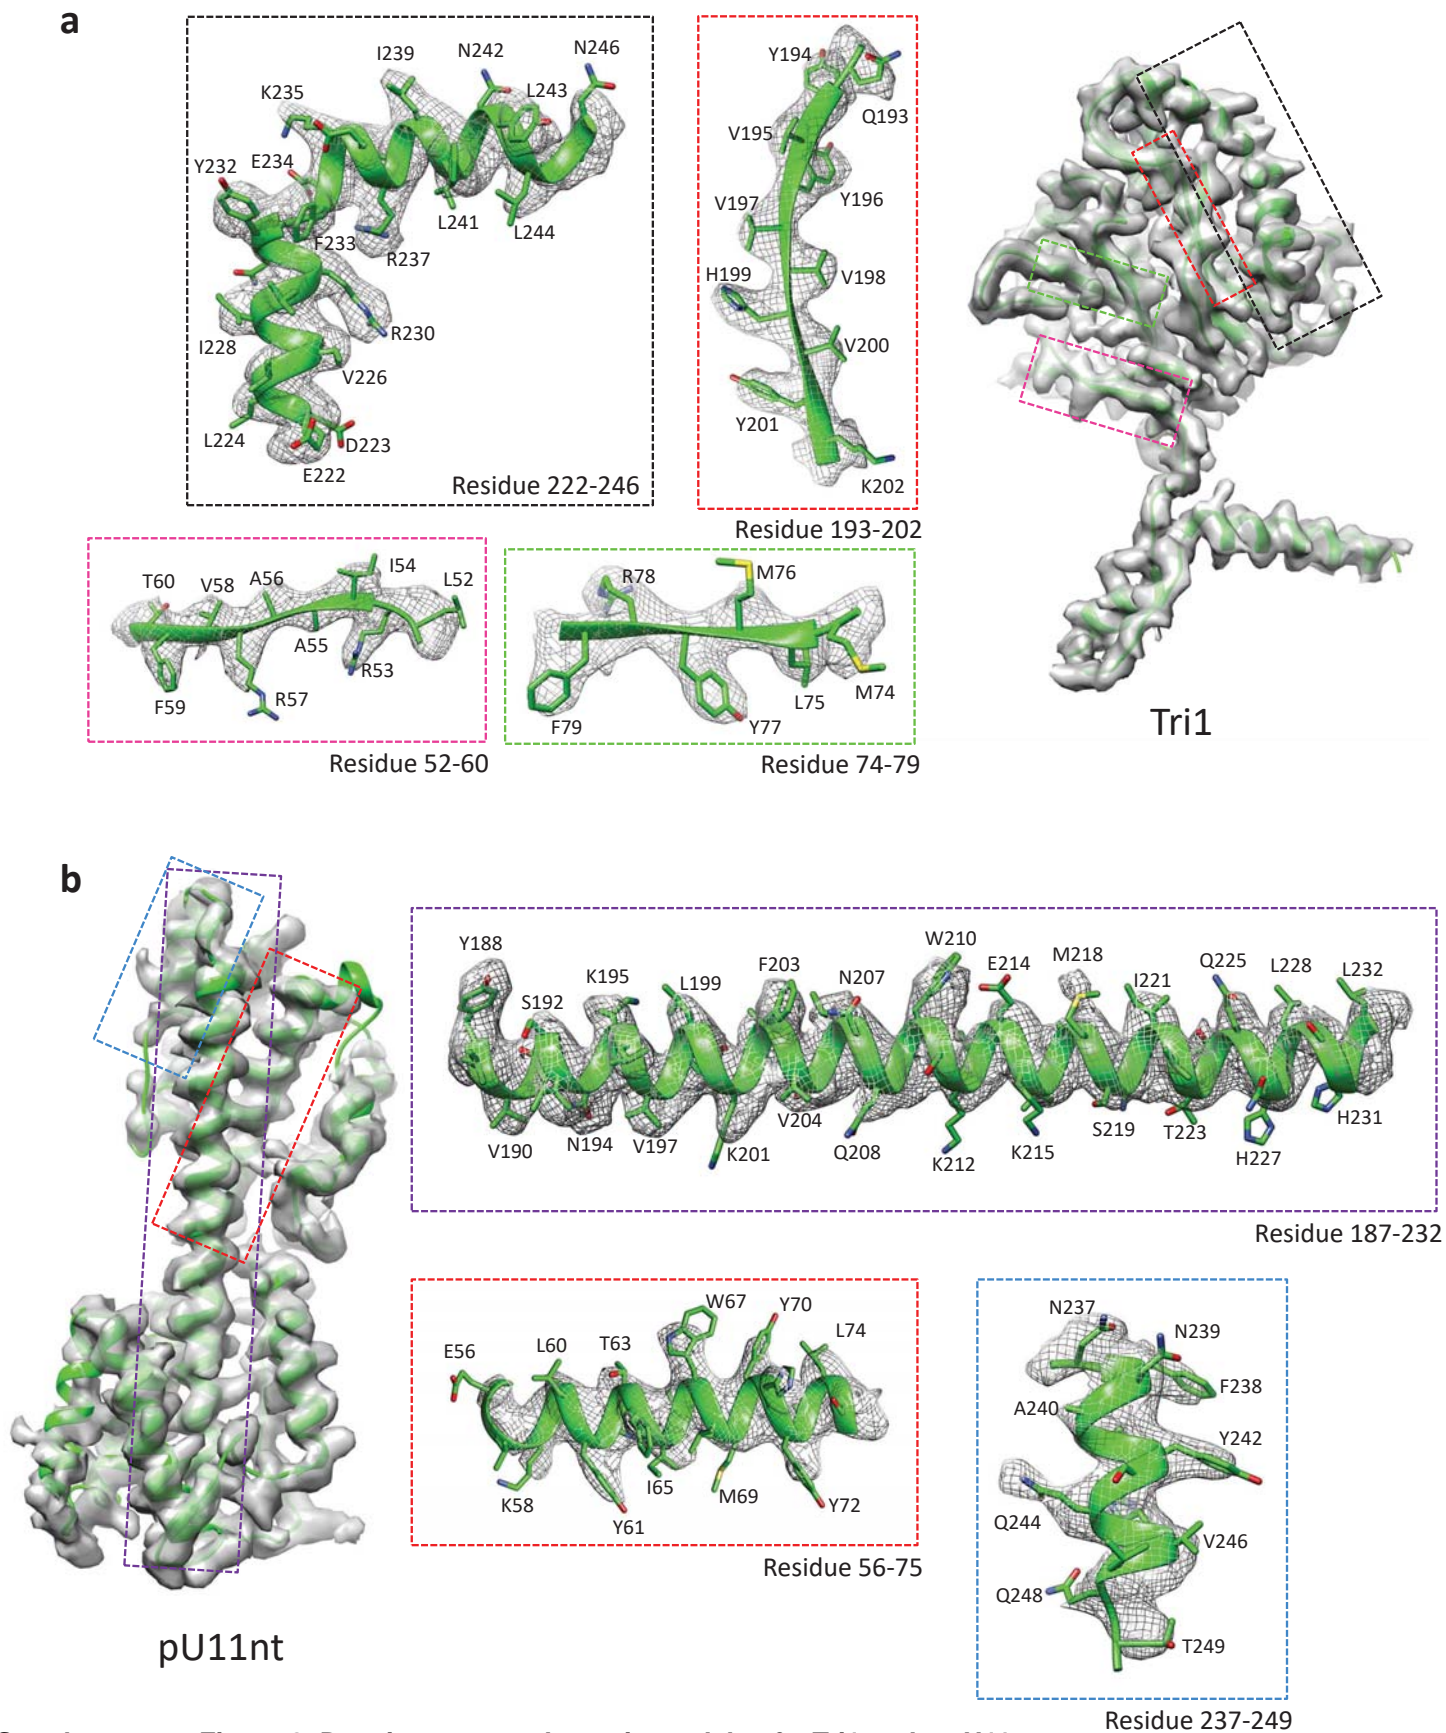

**Supplementary Figure 8. Density maps and atomic models of a Tri1 and a pU11nt monomer.**

(a-b) The density maps (gray) of a Tri1 (a) and a pU11nt (e.g., pU11-a-2) (b) (segmented out from triplex Tb of the 3-fold axis sub-particle reconstruction) at 3.77 Å are superposed with their atomic models (ribbon). Boxed regions are enlarged, with density shown as gray mesh and atomic models as ribbon/sticks, in boxes with corresponding color edges.

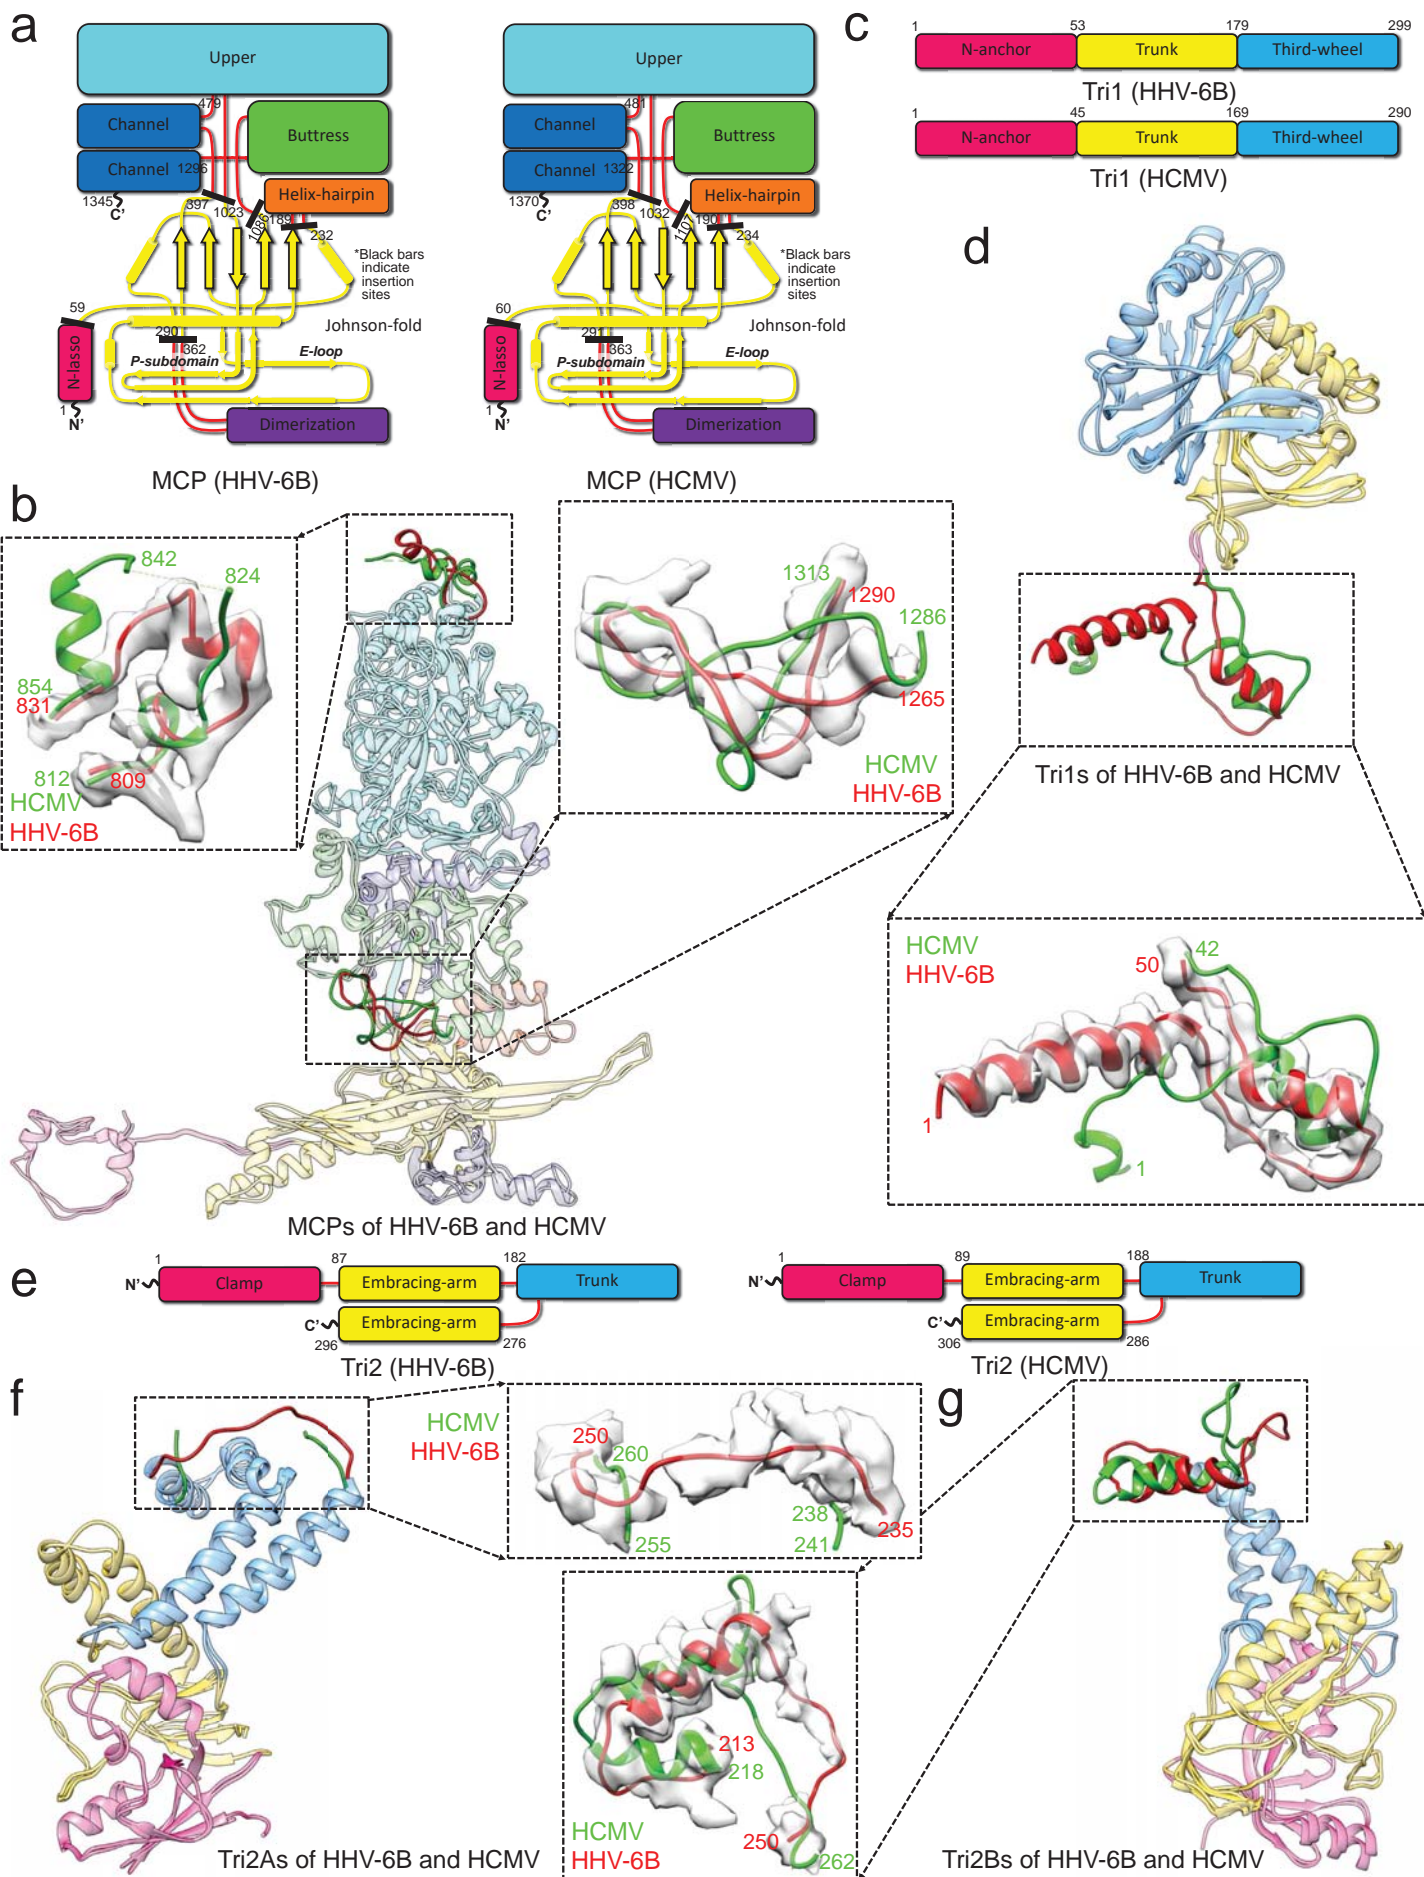

**Supplementary Figure 9. Structural differences between corresponding HHV-6B and HCMV subunits of MCP, Tri1, Tri2A, and Tri2B.**

(a) Schematics of MCP domain organization in HHV-6B and HCMV. (b) Superposition of the structures of the C6 subunit of MCP from HHV-6B and HCMV colored as in (a) by domains. Structural differences are located mainly in their upper (left inset) and buttress (right inset) domains, which are shown together with the HHV-6B cryoEM map (semi-transparent gray) in the insets. (c) Schematics of Tri1 domain organization in HHV-6B and HCMV. (d) Superposition of the structures of Tri1 subunit of triplex Td from HHV-6B and HCMV. Structural differences are located in their N-anchor domains, which is shown together with the HHV-6B cryoEM map (semi-transparent gray) in the inset. (e) Schematics of Tri2 domain organization in HHV-6B and HCMV. (f, g) Superposition of structures of the Tri2A (f) and Tri2B (g) subunits from triplex Td from HHV-6B and HCMV. Structural differences are located mainly in their embracing-arm domains, which are shown together with the HHV-6B cryoEM map (semi-transparent gray).

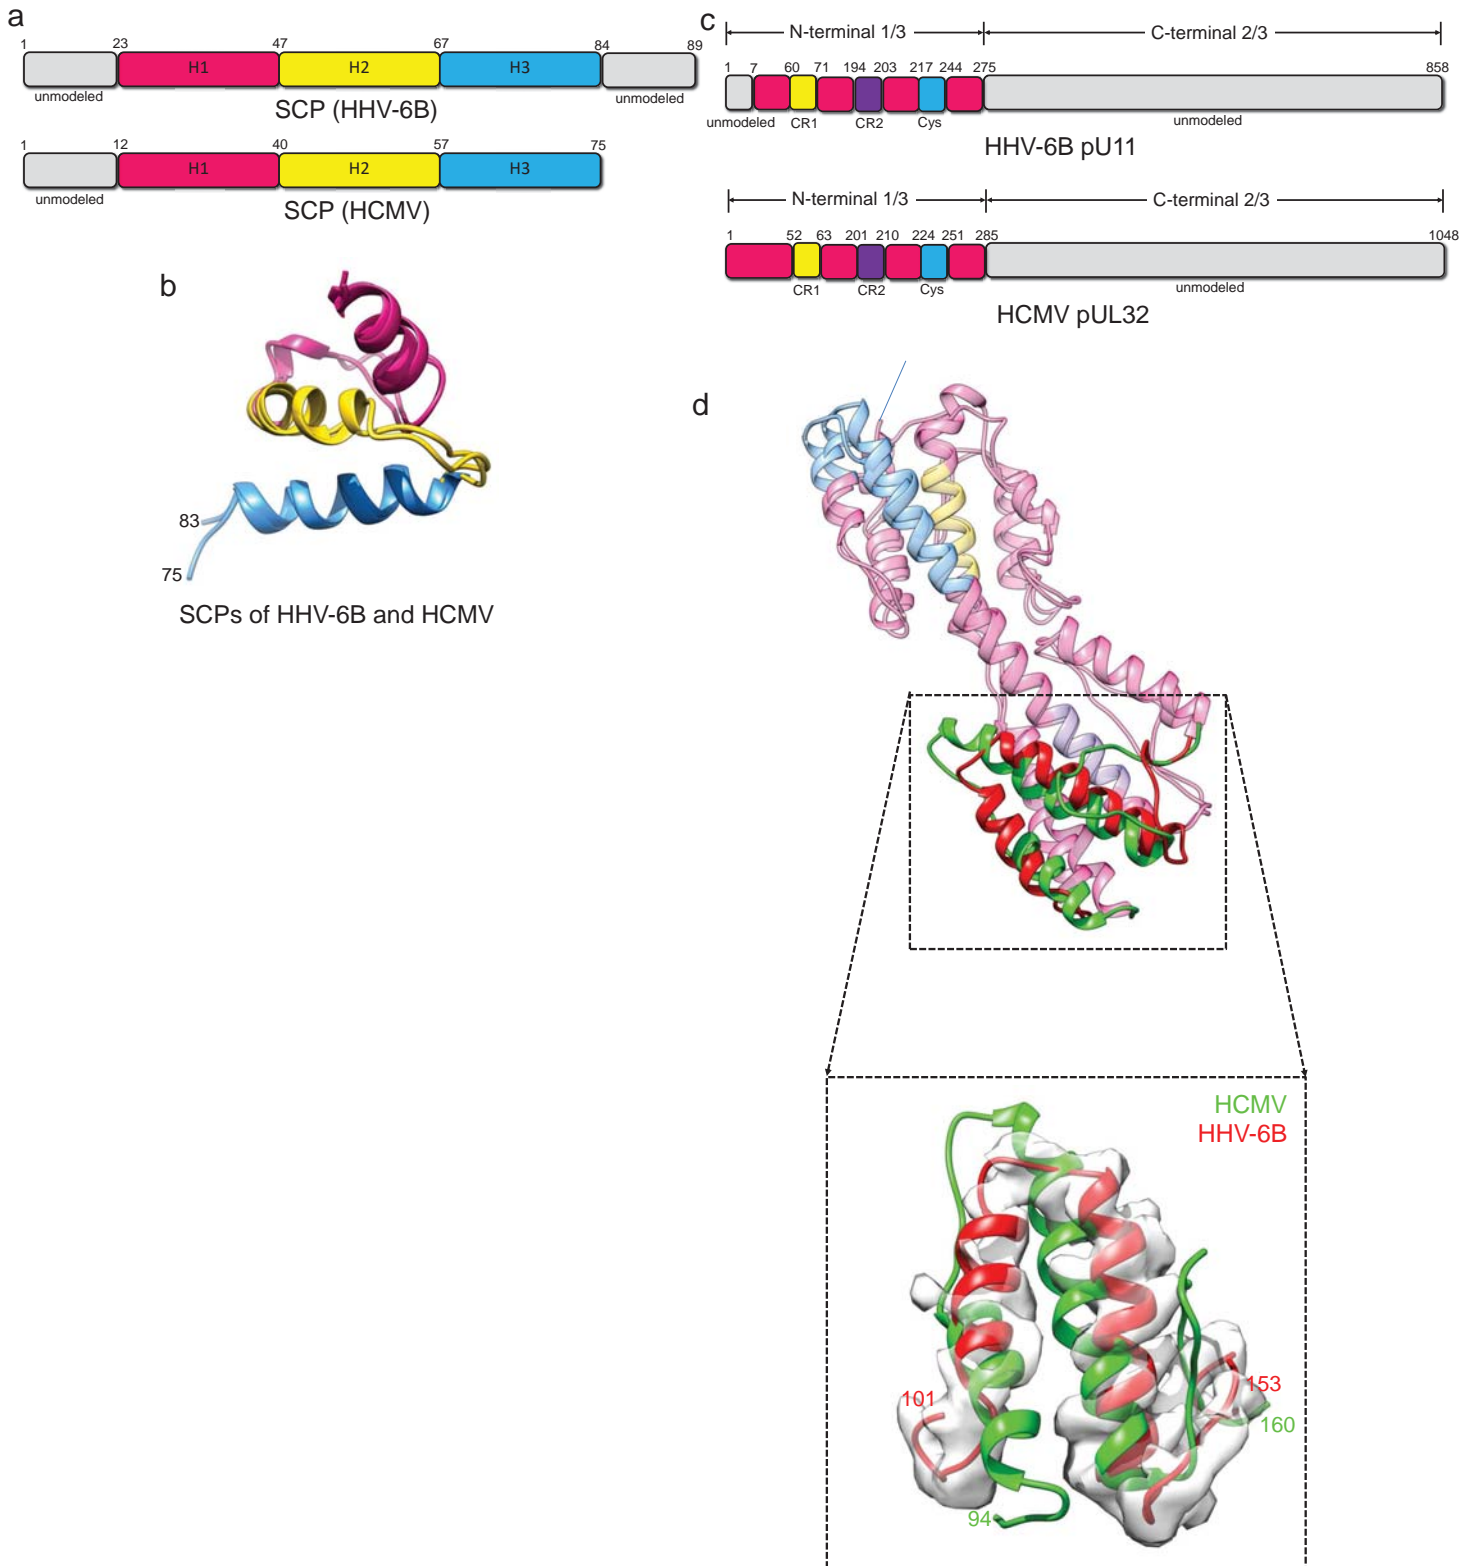

**Supplementary Figure 10. Structural differences between corresponding HHV-6B and HCMV SCP subunits, and between HHV-6B pU11nt and HCMV pUL32nt.**

(a) Schematics of SCP domain organization in HHV-6B and HCMV. (b) Superposition of structures of the C6 conformer of SCP from HHV-6B and HCMV showing minor differences between the two structures. (c) Schematics of domain organization in HHV-6B pU11 and HCMV pUL32. (d) Superposition of the structures of HHV-6B pU11nt (the a-2 conformer bound to triplex Tb) and HCMV pUL32nt (the c conformer bound to triplex Tb). Structural differences are located mainly in the lower domain, which is shown together with the HHV-6B cryoEM map (semi-transparent gray).

HHV-6B (pU11)  
HCMV (pUL32)  
MCMV (pM32)  
HHV-6B (pU14)

α1 TTT η1 α2  
000000000000 TTT 000 000...00  
000000000000 000...00  
000 0000000000 00000  
1 .. MEGSKTFNIPTFVLDENCFIPDVLSTRANAKFIKEVLTIRDSYN  
1 .. MDLKAQSIPIFAWLDLDRDKVQRLTNFLSNLENLENVDIREDHPYV...TN  
1 .. MSIQFIGLQRRDVVALVNFRLRHLTQKPDVDLEAHPKI...LK  
1 MSARGRAAGDDGRQAEELMATLGFVRLSKSSVGGVKKFINNLYDLKSNICRHPV...IA  
1 .. MDLQRHPIPIFAWLDLDRDKVELLTFNLSNLGRLENVDLREHPV...TN  
1 .. MKMSHLPFAWISDEAKCFLSRFENISSLPVVDLIRENHPWI...LS  
1 .. MSGLGFVRLPKRSLRNLRTFLDGFYRERSPNLIFNHPV...IN  
1 .. MSLQFIGLERRDVVHLTGFLLKHLINKADVLEKHPKV...LR  
1 .. MNLSFIGLTHRNVASINKFLKSLSSRPNVDLLEQHPAKV...LR  
1 .. MSLKFIFGLSPRHASINKFLQTLSPKRPVDLEQNAKI...LR  
1 .. MSLKFIGLPPRKVTATNFKLTPKENVLEQHPKI...LR  
1 .. MANLVFIFGLPRRNVTINQFVKTVIKRDDVDLTHHKKI...LK  
1 .. MSDLRFIFGLPRRNVTILVQFLKTLRQRDDVDLEKHPKV...FK  
1 .. MSLKFIGLPPRKVTATNFKLTPKENVLEQHPKI...LR  
1 .. MNLSFIGLTHRNVASINKFLKSLSSRPNVDLLEQHPAKV...LR  
1 .. MARPCLVGVSKRNIIRIRKMNRAALKSGTLSFESHARDE...FL

HHV-6B (pU11)  
HCMV (pUL32)  
MCMV (pM32)  
HHV-6B (pU14)

α3 α4  
0 000000000000000000000000 00000000000000000000  
0000000 0000000 000.00000 00 00000000 00000000  
44 AVCLAN...SFIPTMATOTVEOILLIITIKFKFSRSD...L...MSVFRGLGV  
45 S...CVVREGEDVDELKTLVNFILWLMYHYVLSKRKPDYNAIWQDITKLVNVNEYLKS  
40 K...CGEK...RLHRRITLNFELMLWLGYYRELFHNPDLSSVL...EEFEVRCVAVAR  
58 E...CRGT...DLSRETCLYNEMVWLRVYHEKLTARFPHGLPLTRIRQYDKLFGFVAAR  
45 S...CVVREGEDVDDLKTLVNLVWLMYHYVLSKMKPNYDAIWQDITKLVNVNEYLKS  
43 Q...CIVKTGNSINNVKTLVNLVWLMYHYVLSKMKPNYDAIWQDITKLVNVNEYLKS  
41 E...CRGR...KLSKETLFLNFELMLWLGYYRELFHNPDLSSVL...EEFEVRCVAVAR  
40 R...CGEK...RLHRRITLNFELMLWLGYYRELFHNPDLSSVL...EEFEVRCVAVAR  
40 K...CGEK...ILHRRSYMFKLVVWLMYHYVLSKMKPNYDAIWQDITKLVNVNEYLKS  
40 R...CGER...TLHRRSYMFKLVVWLMYHYVLSKMKPNYDAIWQDITKLVNVNEYLKS  
40 K...CGEK...FLHRRSCLFNQLVWLMYHYVLSKMKPNYDAIWQDITKLVNVNEYLKS  
41 K...CGYK...FLNRRTAAYNELVWLMYHYVLSKMKPNYDAIWQDITKLVNVNEYLKS  
41 K...SGYR...FLPRRTGLFNQLVWLMYHYVLSKMKPNYDAIWQDITKLVNVNEYLKS  
40 K...CGEK...FLHRRSCLFNQLVWLMYHYVLSKMKPNYDAIWQDITKLVNVNEYLKS  
40 K...CGEK...ILHRRSYMFKLVVWLMYHYVLSKMKPNYDAIWQDITKLVNVNEYLKS  
41 RLAVDD...AADEAVACYNEFMVSLYIVDVIRKSKTDDELEK...ALFVSVH

HHV-6B (pU11)  
HCMV (pUL32)  
MCMV (pM32)  
HHV-6B (pU14)

α5 α6  
00000...00000000 0...0000 0.00000000  
00 00000000000 0 00000000000 00000000  
000000000...000000000000 000000000000 0000 000  
87 HINRFYAGK...NQVKHMITMMKSLFDTEEAMRQLDRALMGTFVDARDNSYMP  
104 LNKGNFENM...ATIGQTEPIAFVHLKDTVQRIEENLEGVRRNMFCVKPLD...  
92 YTYPFGD...RGKARDHLAVLDLRTKEFESQ...FSDI...H.RA.LLRLGN  
114 ELCGFDFGLT...EV...NVFDDAVYGD...DYVP...RVDVFLRGLD...LARCLC  
104 LNKGFENM...FTNKEKFSQS...FSDI...N.RA.LLRLGN  
102 MITDYSSLT...SFNKVGFE...FKNV...A.KD.LLKLGS  
97 ELSYFGLS...DV...DVGGMVAD...DYIP...RVDVFIQGLYD...LAAYLS  
92 HMYPFRRD...RARAREHLAVDSTEFDS...EVRH...DADIVEKALRSA.VILAKLAA  
92 HVYPFRRK...PVQARPHLRTLEATGFRD...DART...DVEVVQNTMISA.TALARLSE  
92 HVYPFRRK...PVIARPHLRTLEATGFKD...NART...DVGVVQNALESA.TALAKLSE  
92 HMYPFRRD...PVKARPHLRTLEATVFGD...DSRT...DVTVIQNAWGA.TALAKLSE  
93 KGHSALDMT...RVDVKATVSVLEHEQKNL...LQDL...SRGAIVLIMEA.TSLCRMIV  
93 VGHPEIDMG...KVHVRAAVATLEREQNA...KDL...DQETIKSVLEAA.TMLAKNVV  
92 HMYPFRRD...PVKARPHLRTLEATVFGD...DSRT...DVDVIQKAWGA.TALAKLSE  
92 HVYPFRRK...PVQARPHLRTLEATGFRD...DART...DVEVVQNTMISA.TALARLSE  
88 GICDYIDGTGKPLKCRNPFAL...SIFIKPLSSYL...SDGLVRDVI GAA.AIIGRAEL

HHV-6B (pU11)  
HCMV (pUL32)  
MCMV (pM32)  
HHV-6B (pU14)

α7  
...00000 00000000000000 00000000000000 0000  
143 HENGLPDSKFIKAVRLIQTTVNSFHNRPDADEIQYAEKLR...AYNYLYKIPKYTLKEAV  
136 ...SIRWGS...N...VPIDTPYVNLTAEDSSEIENNLDQAEKNMLWYTVYNI...  
141 ...RETLLT...AIQTEPIAFVHLKDTVQRIEENLEGVRRNMFCVKPLD...  
156 ...A.QGPD...KPARAVIMGFINMRAEENRMLMNVNRDAAERVLVYEVLDV...  
136 ...SIKWGS...N...VAIHTPYVNLTAEDSSEIENNLDQAEKNMLWYTVYNI...  
134 ...FLRWGT...V...THAADYVNLTTERRAIEGENLQKAKNMLSFTIYQI...  
139 ...A.KDGS...K...IADGFGFINLRSDAQRLVSNARSAADNLHTYRLLDV...  
141 ...RTELAK...GLNAIEPIVFNLAEREMQMMENLEKVRHNMFCVKPLK...  
141 ...CQPLTP...G...EVAFIQLREKDVMELEKSLNAIYSNMFVIQPAKL...  
141 ...CQPLTV...G...EVAFIQLREKDVMMLEDLRLNICSNMFVIQPAKL...  
141 ...CQPLGT...G...EIEFIQLRQKDVMALEDLRLNICSNMFVIQPAKL...  
144 ...YGLSS...GC...SFEFVNMRGKDMALLEENIGYAEARNMFQIRPVL...  
143 ...YGKWIT...G...GYDFVNLRRLDVIAIEENLNHAKSNFVSKLEGLTV...  
141 ...CQPLGT...G...EIEFIQLRQKDVMALEDLRLNICSNMFVIQPAKL...  
141 ...CQPLTP...G...EVAFIQLREKDVMELEKSLNAIYSNMFVIQPAKL...  
140 ...GLPCES...ARLMEEYSFVNLDNCRREEIQNEIDKVRGNCLRYDMNFE...



HHV-6B (pU11)  
HCMV (pUL32)  
MCMV (pM32)  
HHV-6B (pU14)

HHV-6B (pU14)  
HHV-6B (pU11)  
HCMV (pUL32)  
MCMV (pM32)  
HHV-6A (pU11)  
HHV-7 (pU11)  
RatCMV (pR32)  
PHV-2 (pUL32)  
SCMV (pUL32)  
MLCMV (pUL32)  
RhesusCMV (pUL32)  
SHV-4 (pUL32)  
AHV-1 (pUL32)  
CMCMV (pcyUL32)  
CHV-5 (pUL32)  
CHV-2 (pGP32)

402 SIAI.....MPSYDK.....TIDV  
357 ..G.KILIKKETLGGRDVRRATTPV.SSVSLMSGVEP.....LSSLTSTNLDL  
357 AHAARS.....AAGVYDEEE.....KRRERQKRVDDEVVQR  
353 LHDDTGIANTCLIGGDEDCGGGSGRCLEFDPDSERCLGVKMVNGRALRWNNPTGIMV..  
356 ..G.KILIKEATLGGEDVKATTPA.SSVSLMSGVESPPSSFTSTNL.DLPLSSFTSTNLDL  
337 ..N.NTLSKDLFVGSSEGD.....LLSSVKKD...SMIL.DEPRNS...TSINN  
342 RGDDDRGKETPGRS.....ASRG.....RGGSVREDDGGRSSWRSATDGEL..  
351 .....PFLD.....KKTREEIER  
313 .....DYESKFE.....S.....  
314 .....PEYNKWD.....T.....  
315 .....TKDDDDD.....N.....  
.....  
.....  
.....  
315 .....TKDDDDD.....D.....  
313 .....DYDSKLE.....T.....  
348 .....FG.SDGLNDVNN.....

HHV-6B (pU11)  
HCMV (pUL32)  
MCMV (pM32)  
HHV-6B (pU14)

HHV-6B (pU14)  
HHV-6B (pU11)  
HCMV (pUL32)  
MCMV (pM32)  
HHV-6A (pU11)  
HHV-7 (pU11)  
RatCMV (pR32)  
PHV-2 (pUL32)  
SCMV (pUL32)  
MLCMV (pUL32)  
RhesusCMV (pUL32)  
SHV-4 (pUL32)  
AHV-1 (pUL32)  
CMCMV (pcyUL32)  
CHV-5 (pUL32)  
CHV-2 (pGP32)

▶TT→ . . . . . QQQQQ . . . . . QQQQQQ . . . . . QQQQQ . . . . .  
417 EDNEI.QVLEVEMQSLSAVVY.....GAVASKYGLSLEQVIRKLNQNEGR.....  
400 RDKSHGNYRIGPSGILDFGVK.....LPAEA.....QSNITGD.....VD  
389 EKQQL.KAWEERQNLQRRQQP.....PPPARKPS.ASRRLFGSSADEDDDDDDDEKN  
411 .DNEA.AVWIDEHG...RVMDKP.....PP.....KELRKASSDDGGN.....KK  
411 RDKSHGNYKIGPSGILDFNVK.....FPPDA.....QLNTND.....VD  
375 SKK...MHRILQTEILDLDTDQ.....TM.....HRP.....ED  
382 .SDGE.RSWSGDGDGFDLSDV.....RSLRAEPDAAGDG.....DR  
364 EKKR.DREWERKQKALRDAATQGRADAGRTPMRTRR.GSPSLFRESSDDDD.DDDIDGR  
321 ..KK.Y.....  
322 ..KK.DKWDTKKDEWDTKKD.....ES.....  
323 .....GQLLTTK.....K.....  
311 .....SL.....PES.....  
317 .....VFPK.....PPDSG.....  
323 .....NQLFTTK.....K.....  
321 ..KK.Y.....  
359 .....LLKNITI.....TPKRILSDTAYRLRGLADDHDK...RHEER

HHV-6B (pU11)  
HCMV (pUL32)  
MCMV (pM32)  
HHV-6B (pU14)

HHV-6B (pU14)  
HHV-6B (pU11)  
HCMV (pUL32)  
MCMV (pM32)  
HHV-6A (pU11)  
HHV-7 (pU11)  
RatCMV (pR32)  
PHV-2 (pUL32)  
SCMV (pUL32)  
MLCMV (pUL32)  
RhesusCMV (pUL32)  
SHV-4 (pUL32)  
AHV-1 (pUL32)  
CMCMV (pcyUL32)  
CHV-5 (pUL32)  
CHV-2 (pGP32)

461 T.....SSRASPSHSTST.....VPYSPFQRHRSTPTSILRQRV  
434 LLQDKTSIRSPSSGITDVVNG...LAN.....  
441 IFTPIKKPGTSGKGAASGGGVSSIFSGLLSSGSQKPTSGPLNIPQQQQRHAAAFSLVSPQV  
446 NPPPKKNVTPPVSGNSVGGGVQTPS.....T  
445 LLQDKTSIGSPSSGITDVVNG...FAN.....  
400 KVNQFNEIAVAPDGINQVIDT...LSK.....  
418 KAGAKRR.....ASVGAA.....  
421 TFAPIRNPSTRPSAPGSA.GSGIFSAPK.....LGSNI..APPYRQTAFDILSPIP  
324 .....DFKKPSGKTDRQVAFSMLSPTE  
341 .....EKKHSDTKDRQMAFMSLSPTE  
331 .....QERKVPDKSERQYAFSLLSPTK  
316 LLADLKDPAVR.....YKVFDIRPETERHKAFFILSDDD  
326 DLLDLKDPAVR.....RHVFDIEP.....LDDE  
331 .....QERKVPDKSERQYAFSLLSPTK  
324 .....DFKKPSGKTDRQVAFSMLSPTE  
393 P..DAGRADAKPSGK..DG.ETSR.....YTLDAD..

HHV-6B (pU11)  
HCMV (pUL32)  
MCMV (pM32)  
HHV-6B (pU14)

HHV-6B (pU14)  
HHV-6B (pU11)  
HCMV (pUL32)  
MCMV (pM32)  
HHV-6A (pU11)  
HHV-7 (pU11)  
RatCMV (pR32)  
PHV-2 (pUL32)  
SCMV (pUL32)  
MLCMV (pUL32)  
RhesusCMV (pUL32)  
SHV-4 (pUL32)  
AHV-1 (pUL32)  
CMCMV (pcyUL32)  
CHV-5 (pUL32)  
CHV-2 (pGP32)

495 .....PIRSNSRSS.....SVSFSQEDSNRSH...YS.  
458 ..LNLRQKSDVSRPWSKNTAANADVDFPVHRLVSEQTGTGTFV.LNNSDVAGSEAKLTH  
501 TKASPGR...VRRD.....SAWDV...RPLTETRGDLFSGDESDS.....S  
473 ..ASGKR...T.....GKKKEGGGGYLLRSRSTDDDEVKMKK  
469 ..LNLHQKNSNVSPWSRNTAANADFLDPVHRFVPEQTGTGTFV.LNNSDVAGSEAKHTTY  
424 ..LDLHNSNKVIDIVSSPKV..NV.VQLPKNKI...DYHSTFELPENEVNRQNGVQS.R  
431 .....S.....AADRPRARTYWLESGGDPSSGGGAPGPE  
469 TRASDNR...LRRD.....AAWES...VTPLTVTRSSDWLTEEDSGSDD...YQL  
346 ..KRDFWEKPVTT.....KPSAKRRVTFWSDDENNDWK.E...KK.  
363 T.KADFWEKPTSATVSWEKPALTTTAWKKSAAATVPSAKRVTFWPDDDKQEW.N...TE.  
353 Q.SSQFWDTKP.....KTPHPVSKRVTFWSDDENQGRAK...DE.  
350 EK.PDYSQKKRRDRD.....SWW.EVDSTDDSTK...KAS  
349 EG.FGYSQNRHRD.....YTWDVQYGGDQDK...PKR  
353 LTSSQLWDTKP.....KTPHPVSKRVTFWSDDENQGRATK...GE.  
346 ..KRDFWEKPVAT.....KPSAKRRVTFWSDDESDDWK.E...NK.  
417 .....TSDLYKIANVPIPPSPEEGGELNEPFEGRPDRR.TQL

HHV-6B (pU11)  
HCMV (pUL32)  
MCMV (pM32)  
HHV-6B (pU14)

HHV-6B (pU14)  
HHV-6B (pU11)  
HCMV (pUL32)  
MCMV (pM32)  
HHV-6A (pU11)  
HHV-7 (pU11)  
RatCMV (pR32)  
PHV-2 (pUL32)  
SCMV (pUL32)  
MLCMV (pUL32)  
RhesusCMV (pUL32)  
SHV-4 (pUL32)  
AHV-1 (pUL32)  
CMCMV (pcyUL32)  
CHV-5 (pUL32)  
CHV-2 (pGP32)

```
519 .....DETNISDYSPMADLEL.....EDEEPMEDH
515 ..STETG...VSPHNVSLIKDLRDKDGFRK....QKKLDLLGS....WTKEKNDKAI
537 DGYPPNR...QDPRFTDTLVDTIDTETS...KPPVTTAYKFEQPTLTFGAGVNV...
506 DGTIDDR.....ADR...ELKMALQKAR.ESTADSDLSTILPRTEPLRKFVAFVGDVVA
526 ..STETG...VSPRNVFLIKDLRGKDGFRK....QKQSDIPKS....LTKERNDKAI
474 ..DQLSK...NSTNDLQKILELRERIKTIK....QNNEDIFK....LPSEKRRKEI
459 RVFVSDG.....KTV...TLPVALDAAS.PSPASS...T...RPPPERPGTEIGTDDV
510 RGYAPTGPSPSSSRVSNLTVDLTTPGGNA....AQPQQTSTYKFETVPLVTPQPSI...
379 .....AEKTKGDSMLDLGDSLESKLDSTMDRPTSTYRFEPFKLVQSSEYN....
417 .....TDNVKVDKLVLDLGNLEGLKLDKSKQ.HTIPVYKFEPFKLAPSTEHN....
388 .....TDDVKVDTLVDFDGGLSLKLDDDDKPKSTYKFELPKFIQTPILSQ...
379 .....AL...DSSGLLDLEKLEKLDVG...GVPTQAFVFEFFPKPTETVSG....
378 RGSSPKG.....ASGSVEDLVDRLDVK...GGKKPMFVFEPPSIMPSTVT....
389 .....TDDVKVDTLVDFDGGLSLKLDDDDKPKSTYKFELPKFIQTPILSN...
379 .....AEKTKGDSMLDLGDSLESKLDSTMDQPMSTYKFEPFKLVQSSEYN....
454 DNDI.....DQMNIRPLSSAVQPKIVTFAHPEPSKAVTFSPKINLPLTAS....
```

HHV-6B (pU11)  
HCMV (pUL32)  
MCMV (pM32)  
HHV-6B (pU14)

HHV-6B (pU14)  
HHV-6B (pU11)  
HCMV (pUL32)  
MCMV (pM32)  
HHV-6A (pU11)  
HHV-7 (pU11)  
RatCMV (pR32)  
PHV-2 (pUL32)  
SCMV (pUL32)  
MLCMV (pUL32)  
RhesusCMV (pUL32)  
SHV-4 (pUL32)  
AHV-1 (pUL32)  
CMCMV (pcyUL32)  
CHV-5 (pUL32)  
CHV-2 (pGP32)

```
545 PHS.....PQSTSSNN..SMSTR.....QSRALQNGQRRRAPTMVFPSSQTR.RQNN...
559 VHS.....REVTDGSDGDATEI.....VTARDSPLVRKTT.....
586 PAG.....AGAAIILTPPVNPS.....TA..PAPAPTPTFAGTQTPV
555 AFGDVTVRTTSSSKGFDDGPFITQAGSVLPPPLGGPGSTLT...LPPDLPLDSGLVADE
570 MHS.....REVTDGSDGDATEI.....VGARNSPALRKI...
517 VHE.....NLQSFDEHNEMSE.....LPPQDQKSIKQK...
502 VFP.....PISYLDERYFRPS.....GPRVDGPPGGREER..DLSPLRPR...
562 L.....MPIRLGTQTPSNPS.....AA.PAPASTPTLGGNSESP
425 PFL.....QPLPNTNE..YES.....FR..PLPPEE.....
462 PFI.....QPIPHLEP..TSS.....FQ..PIKIDN.....
435 PFA.....TQFSN.....P.....
420 PFA.....PVSEQGDLEK..TS.....LT..PET.....
424 PFS.....QALGSPSSD..VT.....VL..H.....
436 PFA.....TQFSN.....P.....
425 PFL.....QPLPKFTNE..YES.....FK..PLPPDD.....
500 PFSVLRKTDAPAGQGDVRR.....RVET..PEPSSADDFSLISESE
```

HHV-6B (pU11)  
HCMV (pUL32)  
MCMV (pM32)  
HHV-6B (pU14)

HHV-6B (pU14)  
HHV-6B (pU11)  
HCMV (pUL32)  
MCMV (pM32)  
HHV-6A (pU11)  
HHV-7 (pU11)  
RatCMV (pR32)  
PHV-2 (pUL32)  
SCMV (pUL32)  
MLCMV (pUL32)  
RhesusCMV (pUL32)  
SHV-4 (pUL32)  
AHV-1 (pUL32)  
CMCMV (pcyUL32)  
CHV-5 (pUL32)  
CHV-2 (pGP32)

```
587 .....AR.....PR.....
587 .....KHAN.....DIFAGLNKKYARDVSRGGKGNRSRD
621 ..NGNSPWAPTAPLPGD.MNPANWPRERAWALKNPHLAYNPFMRPTT.....ST
611 ..DVQD.....SRYGKI...
598 .....KQAN.....DFFAGLNKKNDRDVLRGGKGNRDKD
545 .....NGNKAN.....SSTKTLNMI GTNDVNA.....
539 .....SLTGKA...
595 ..LISIDSGITPPMTEQQAAAIRNPNRAWAVKVPWLAVNDFAPYAQ.....ST
448 .....KPTVADWNTNIFYPGLSTP...LVPLSDEGKTDVSDGERTDGS
484 .....RGLFDWSNELSSLKPTDAPTIVPVFP...PD
444 .....LFATGSSETIPGLETPLKEV.....SG.....
439 .....EEVASVE.....
441 .....DEQAKRS.....
445 .....LFATGSSETIPGLETPLKEV.....SD.....
448 .....KTTVADWTKTFYSGLPTS...IVPLSDEGKTDVSDGERTDGS
538 APDAESDVPAAEAPDSS..K.....AIDD.....IVGKLQQM.
```

HHV-6B (pU11)  
HCMV (pUL32)  
MCMV (pM32)  
HHV-6B (pU14)

HHV-6B (pU14)  
HHV-6B (pU11)  
HCMV (pUL32)  
MCMV (pM32)  
HHV-6A (pU11)  
HHV-7 (pU11)  
RatCMV (pR32)  
PHV-2 (pUL32)  
SCMV (pUL32)  
MLCMV (pUL32)  
RhesusCMV (pUL32)  
SHV-4 (pUL32)  
AHV-1 (pUL32)  
CMCMV (pcyUL32)  
CHV-5 (pUL32)  
CHV-2 (pGP32)

```
591 .....RVA.....RRL...TEMMNDAR...L.....
615 LYSGGNAEKKETS SGKFNVDKEMTQNEQEPLPNL..MEAARN..AGEEQYVQAGLGRVNNK
667 AS.....QNTVSTT...PRRS...TPRAAVTQTASRDAA...DEVWALRDQTAES
621 .....PKSR.TKKHPTFEPN...YKQRP..P..PHNKDD..EYYWDETGDNMPV
626 LHSGGNAKKKEMSGKFNVDKEMTRNGQEPSRSL..MGDSRN..AGDGQYIQAGLGRVNN
567 .....SMKEKESASSAKKNQLVKDVKWTPSSSL..LDLSRRNDLLQKELFESGLGEKVKK
545 .....VRPRKAAAQRNSGAS...YAKRR...PTVRSDDDED..EYYWDDLGEADDG
642 KP...TLTPAALSTQ...PLVTSVWQPSPNKSSIGSTRSSAT..RT...PASIINT
488 SS...DVEK..TVSDFSKIDFTDPNSNFSAPAKRREGNSGTEGSD...SDGE
512 SD...VETKGAASDLSVDVFTDPNSNFSAPAKRRDPSETEASDDD...DDGVR
466 LD...SISDYETKTPPASDYSRESSFSFNKRREVKSEAEMSE...SEYE
446 .....KEKKENEDEGEDED..DEESIET.....
448 .....AGSGDGDQGDDED..DEVAEEEV..EEEE
467 LD...NMSDRERKTPPGSDYSRESSFSFNKRREVKSEAEMSE...SEYE
488 SS...DVEKPVFDLSDIDFTDPNSNFSAPAKRREVNNSGTEGSD...SDGE
```



HHV-6B (pU11)  
HCMV (pUL32)  
MCMV (pM32)  
HHV-6B (pU14)

HHV-6B (pU14)  
HHV-6B (pU11)  
HCMV (pUL32)  
MCMV (pM32)  
HHV-6A (pU11)  
HHV-7 (pU11)  
RatCMV (pR32)  
PHV-2 (pUL32)  
SCMV (pUL32)  
MLCMV (pUL32)  
RhesusCMV (pUL32)  
SHV-4 (pUL32)  
AHV-1 (pUL32)  
CMCMV (pcyUL32)  
CHV-5 (pUL32)  
CHV-2 (pGP32)

671 I.....LAEFTNLISLGEK.....GIQDILHNQSGTELKLPNTENKLGRES  
709 PVEDSEEEEDDD...SSDTGSVSVSLGHTTPSSDY.NNDVISPPSQTPSEQSTPS.....  
660 GEDG.....GGVLEDLR.....KGLEGIDL..KTGGG.....  
682 L.....LSQFTNLISLGEK.....GIEDILQNQRGTTELKLATENKSGRES  
620 L.....LTDFTDTISLEER.....SLKDVLEPPKKTVDVSNIA.....TF  
587 .VAE.....DDDFERIQ.....RQLQGLNINSPTAGG.....  
689 DSESDSDEEAT...SSDASSVKSQRTVPPKRP.FTK.....TPTMTGP.....  
531 SVTDLFSD.DG...VSDAESVSVSPPETQ.....P.K.....  
559 EVADLFSD...GSDAESVASVASVAV.....TPK.....  
510 DIASGDGDEEA...SDAESVSVASIPPATPV.....PPVSDPK.....  
466 .....IDVADKVKQIV.....D.....  
473 EPDEGEDEEDGAGGGGDDGAPAPAAPVTPPEAAANIQKIV.....E.....  
511 DIASGDGDEEG...VSDAESVSVASMPATPV.....PPVSDPK.....  
532 SVTDLFSDNDG...VSDAESVSVRPEKP.....PPK.....

HHV-6B (pU11)  
HCMV (pUL32)  
MCMV (pM32)  
HHV-6B (pU14)

HHV-6B (pU14)  
HHV-6B (pU11)  
HCMV (pUL32)  
MCMV (pM32)  
HHV-6A (pU11)  
HHV-7 (pU11)  
RatCMV (pR32)  
PHV-2 (pUL32)  
SCMV (pUL32)  
MLCMV (pUL32)  
RhesusCMV (pUL32)  
SHV-4 (pUL32)  
AHV-1 (pUL32)  
CMCMV (pcyUL32)  
CHV-5 (pUL32)  
CHV-2 (pGP32)

711 EEANVERILEVSDPQNLFKNFKLQNDLDSVQSEFRLPNADLSRDLDVSFVKDALDVKLPG  
757 ..RIRKAKLSSPMTT.....STSQK...VATPH.ASARAQTVTSTPV  
685 .....GSLQPPLSQQ.....FAGSEFAGSDGDGGGLVK.KSSSS.....  
722 EEANVQKILEFSNPQDMFKNFRLQNNLDSVQSEFRLPDVDLSRELDASFKDALDLKLP  
654 NDNNLKNLLNSRKRDLFQNFSTTEKMQPVRSEFFLPAEIQD.FDSGSLLTGKET...  
613 .....PQFAPPLSRG.....MPSEFSLPAGDAVGGPD.ASDSSG.....  
729 ..QKSTRTFTTPVIPS.....TGTQT...VFGAR...VRTPA.PTARAQTVSSSPV  
558 ..AKRKILVAK.....SPVKPKTKIPKPK...SLGPF...PPLT...SPNIVEIKAP  
586 ..AKRKLVLLEPK.....TVKLQPKPK...SLGPF...PPVDP...LAAIDTRIL  
546 ..AKRRLILKPK.....TK.IIPKPK...SFGPF...TSVTS...PSTSV.....  
478 ..AIKDNEES.....  
514 ..AIKEDQLSP.....  
548 ..AKRRLILKPK.....TKKNVPKPK...SLGPF...TSVTS...PSTSV.....  
561 ..TDRQILVAKKPTVRPKSRVTPKPKVIPKPK...SLGPF...PQAS...PNIVEIKPP

HHV-6B (pU11)  
HCMV (pUL32)  
MCMV (pM32)  
HHV-6B (pU14)

HHV-6B (pU14)  
HHV-6B (pU11)  
HCMV (pUL32)  
MCMV (pM32)  
HHV-6A (pU11)  
HHV-7 (pU11)  
RatCMV (pR32)  
PHV-2 (pUL32)  
SCMV (pUL32)  
MLCMV (pUL32)  
RhesusCMV (pUL32)  
SHV-4 (pUL32)  
AHV-1 (pUL32)  
CMCMV (pcyUL32)  
CHV-5 (pUL32)  
CHV-2 (pGP32)

771 NGEREIDLAL.QKVKAGERETSDFKVGQDETLIPTQLMKVETPEE.....  
800 QGRLEKQVS...G.....TPSTVPATLLQPQPASSKITSSRNVTSGAGTS  
782 NGEREIDLAL.EKVKVGETETSDDLKVGQDESFPVPAQLMKVETPEE.....  
709 ..QNTIFGASKAQEDGDKD.....LIDLENSVQK.....  
647 .....VTVLSND.....TGDRRRHKSGSGGR  
772 SPAPPVKSQ...AQPMGSRI.....S.TAPTMPASFLTANVPKT.PS.....  
602 D.....D...IKPLESKV.....P.KTVKAPPTVVKPATLN.....  
627 K.....PT...VKPVTPKP.....PVATKPVVLKPATLQ.....  
580 .....LKPRKVIK.....A.TPLTVDGSVLKPASF.....  
583 .....LKPRKVIK.....A.TPITLDGSVIKPANFS.....  
610 E.....IKSPEIKA.....P.KSAKATP.VVKPATLV.....

HHV-6B (pU11)  
HCMV (pUL32)  
MCMV (pM32)  
HHV-6B (pU14)

HHV-6B (pU14)  
HHV-6B (pU11)  
HCMV (pUL32)  
MCMV (pM32)  
HHV-6A (pU11)  
HHV-7 (pU11)  
RatCMV (pR32)  
PHV-2 (pUL32)  
SCMV (pUL32)  
MLCMV (pUL32)  
RhesusCMV (pUL32)  
SHV-4 (pUL32)  
AHV-1 (pUL32)  
CMCMV (pcyUL32)  
CHV-5 (pUL32)  
CHV-2 (pGP32)

815 .....KDDVIEKMV.....  
842 SASSARQPSASASVLSPTEDDVVSPATSPLSMLSSASPSPAKSAPPSFVKGRGSRVGVPS  
826 .....KDDVIERMV.....  
736 .....DDDIVNKLK.....  
810 ...PLAVPRPATTAVKTPASATSSPLRSPASMLSSAPTSAPSSATSSPVKL..TIRPQPS  
629 .....VPTAIA.....TQAKAV...KPSDDAGTAAKVAK.....  
653 .....VPATTT.....ASSAKT...ALN..TVSKALGST.....  
605 .....APIPGK.....DV.....  
608 .....APGSGK.....DV.....  
635 .....APTATE.....T.....

HHV-6B (pU11)  
 HCMV (pUL32)  
 MCMV (pM32)  
 HHV-6B (pU14)

HHV-6B (pU14) 824  
 HHV-6B (pU11) 902  
 HCMV (pUL32)  
 MCMV (pM32)  
 HHV-6A (pU11) 835  
 HHV-7 (pU11) 745  
 RatCMV (pR32)  
 PHV-2 (pUL32) 865  
 SCMV (pUL32) 655  
 MLCMV (pUL32) 677  
 RhesusCMV (pUL32) 613  
 SHV-4 (pUL32)  
 AHV-1 (pUL32)  
 CMCMV (pcyUL32) 616  
 CHV-5 (pUL32) 642  
 CHV-2 (pGP32)

HHV-6B (pU11)  
 HCMV (pUL32)  
 MCMV (pM32)  
 HHV-6B (pU14)

HHV-6B (pU14) 837  
 HHV-6B (pU11) 960  
 HCMV (pUL32)  
 MCMV (pM32)  
 HHV-6A (pU11) 848  
 HHV-7 (pU11) 755  
 RatCMV (pR32)  
 PHV-2 (pUL32) 915  
 SCMV (pUL32) 692  
 MLCMV (pUL32) 693  
 RhesusCMV (pUL32) 631  
 SHV-4 (pUL32)  
 AHV-1 (pUL32)  
 CMCMV (pcyUL32) 636  
 CHV-5 (pUL32) 672  
 CHV-2 (pGP32)

HHV-6B (pU11)  
 HCMV (pUL32)  
 MCMV (pM32)  
 HHV-6B (pU14)

HHV-6B (pU14) 1010  
 HHV-6B (pU11)  
 HCMV (pUL32)  
 MCMV (pM32)  
 HHV-6A (pU11)  
 HHV-7 (pU11)  
 RatCMV (pR32)  
 PHV-2 (pUL32) 974  
 SCMV (pUL32) 732  
 MLCMV (pUL32) 739  
 RhesusCMV (pUL32) 674  
 SHV-4 (pUL32)  
 AHV-1 (pUL32)  
 CMCMV (pcyUL32) 679  
 CHV-5 (pUL32) 711  
 CHV-2 (pGP32)

**Supplementary Figure 11. Secondary structure for pU11nt, pUL32nt, pM32nt, and pU14nt, and pp150 sequence alignment for 15 CMVs.**

Schematic representations of the secondary structure alignment for pU11nt, pUL32nt, pM32nt, and pU14nt<sup>2</sup>, and amino acid sequences of pp150s from HHV-6B<sup>3</sup>, HHV-6A<sup>3</sup>, HHV-7<sup>4</sup>, Human cytomegalovirus (HCMV)<sup>5</sup>, Murine cytomegalovirus (MCMV)<sup>6</sup>, Rat cytomegalovirus Maastricht (RatCMV)<sup>7</sup>, Chimpanzee cytomegalovirus (PHV-2)<sup>8</sup>, Simian cytomegalovirus (SCMV)<sup>9</sup>, Mandrillus leucophaeus cytomegalovirus (MLCMV)<sup>10</sup>, Rhesus cytomegalovirus (RhesusCMV)<sup>11</sup>, Saimiriine  $\beta$ -herpesvirus 4 (SHV-4)<sup>12</sup>, Aotine  $\beta$ -herpesvirus 1 (AHV-1)<sup>12</sup>, Cynomolgus macaque cytomegalovirus (CMCMV)<sup>13</sup>, Cercopithecine  $\beta$ -herpesvirus 5 (CHV-5)<sup>12</sup>, Caviid  $\beta$ -herpesvirus 2 (CHV-2)<sup>14</sup> analyzed and displayed by *ESPrpt* 3.0<sup>15</sup>. Spiral represents  $\alpha$ -helix.

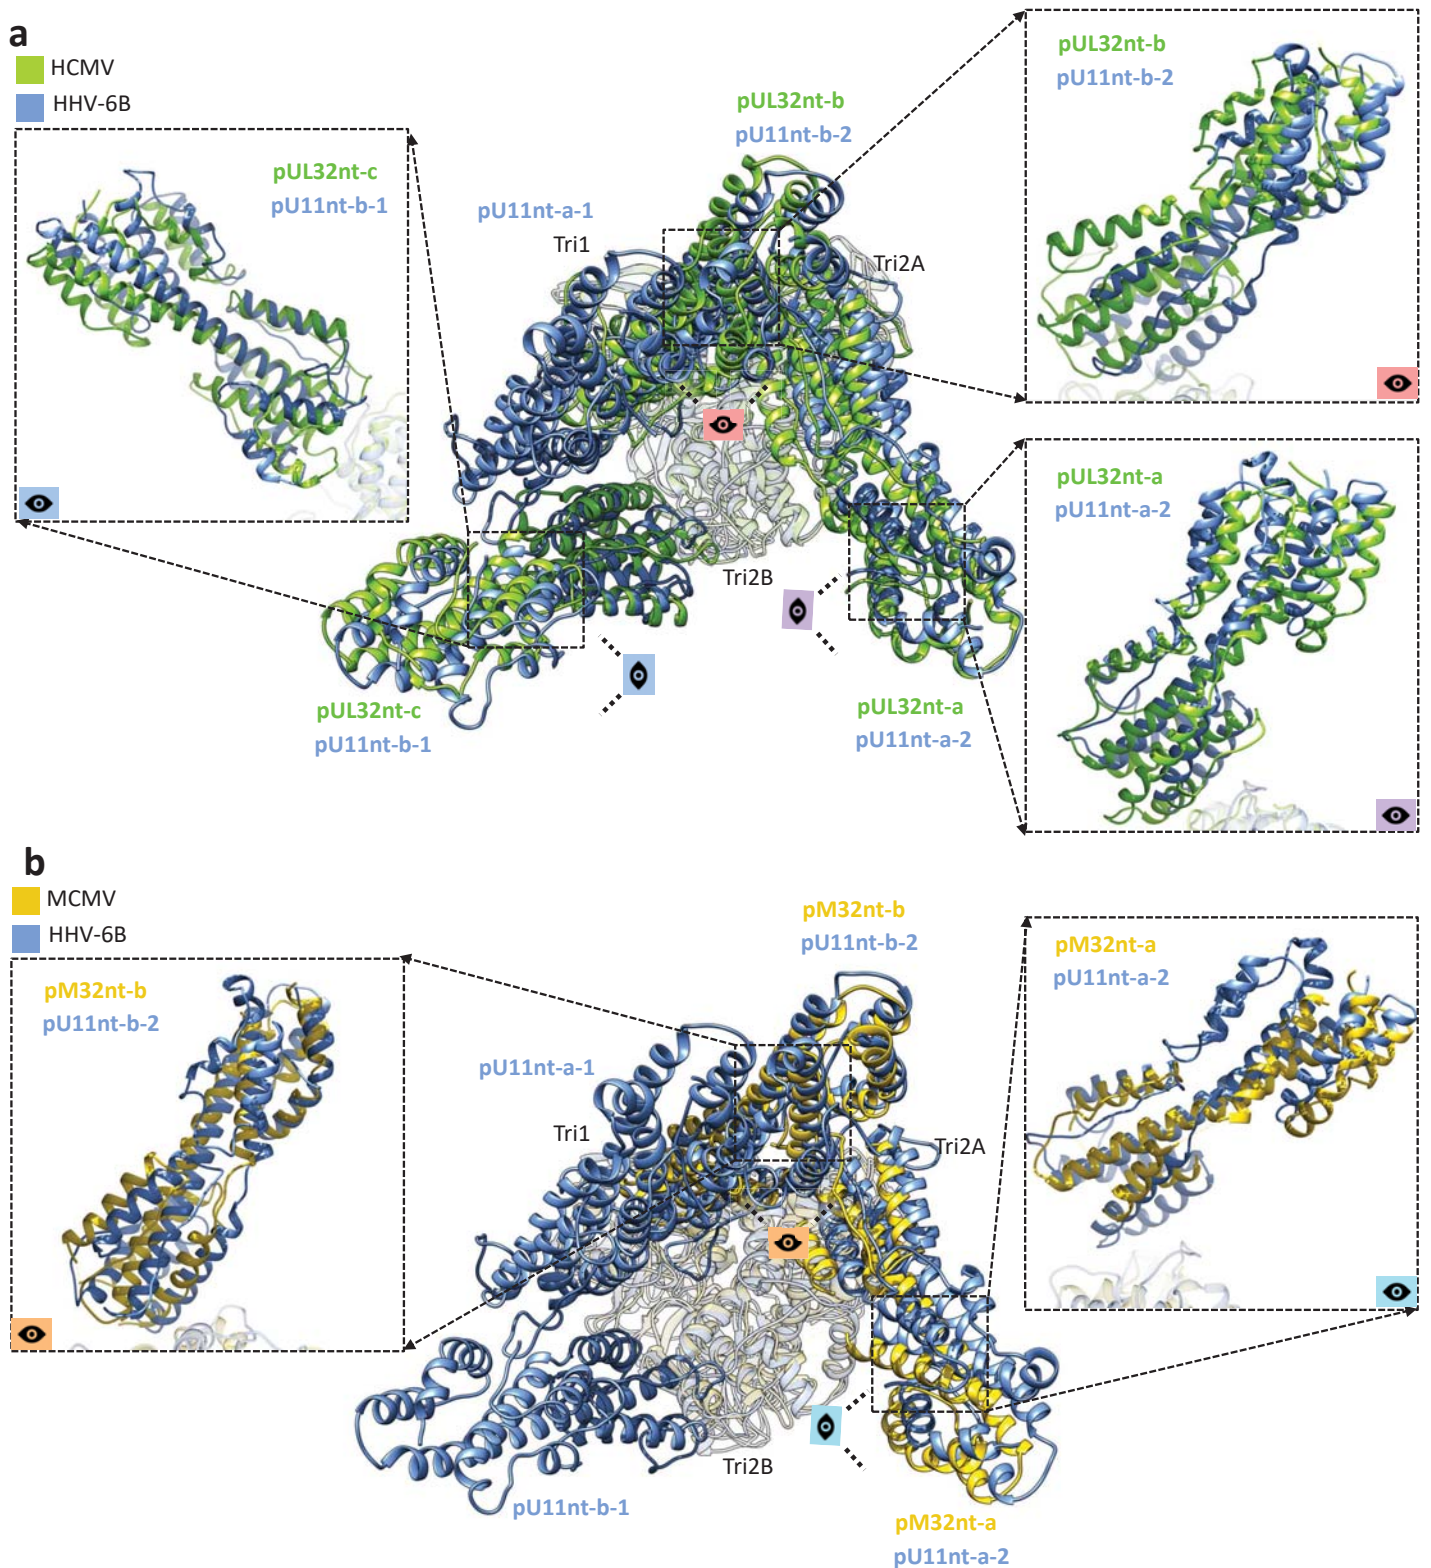

**Supplementary Figure 12. Structural differences of CATCs in HHV-6B, HCMV, and MCMV.**

(a) The atomic models of triplex Te (gray) and pU11 in HHV-6B (light blue) and corresponding structures in HCMV (green) are superposed together as rigid bodies to show differences in their Te-associated CATCs. Conformers b-2 of CATC (*i.e.*, pU11nt-b-2 of HHV-6B and pUL32nt-b in HCMV) exhibit major translational and rotational displacements (upper right panel), while conformers a-2 (pU11nt-a-2 and pUL32nt-a in HCMV, bottom right panel) and b-1 (pU11nt-b-1 and pUL32nt-c, left panel) exhibit relatively minor rotational displacements between HHV-6B and HCMV. Conformer a-1 (pU11nt-a-1) exists only in HHV-6B. (b) The atomic models of triplex Te (gray) and pU11 in HHV-6B (blue) and the corresponding structures in MCMV (gold) are aligned together as rigid bodies to show differences in their associated CATCs. The a-2 CATC conformers (pU11nt-a-2 in HHV-6B and pM32nt-a in MCMV, right panel) exhibit major translational and rotational displacements, while conformers b-2 (pU11nt-b-2 and pM32nt-b, left panel) exhibit relatively minor rotational displacements between HHV-6B and MCMV. Conformer a-1 and b-1 do not exist in MCMV.

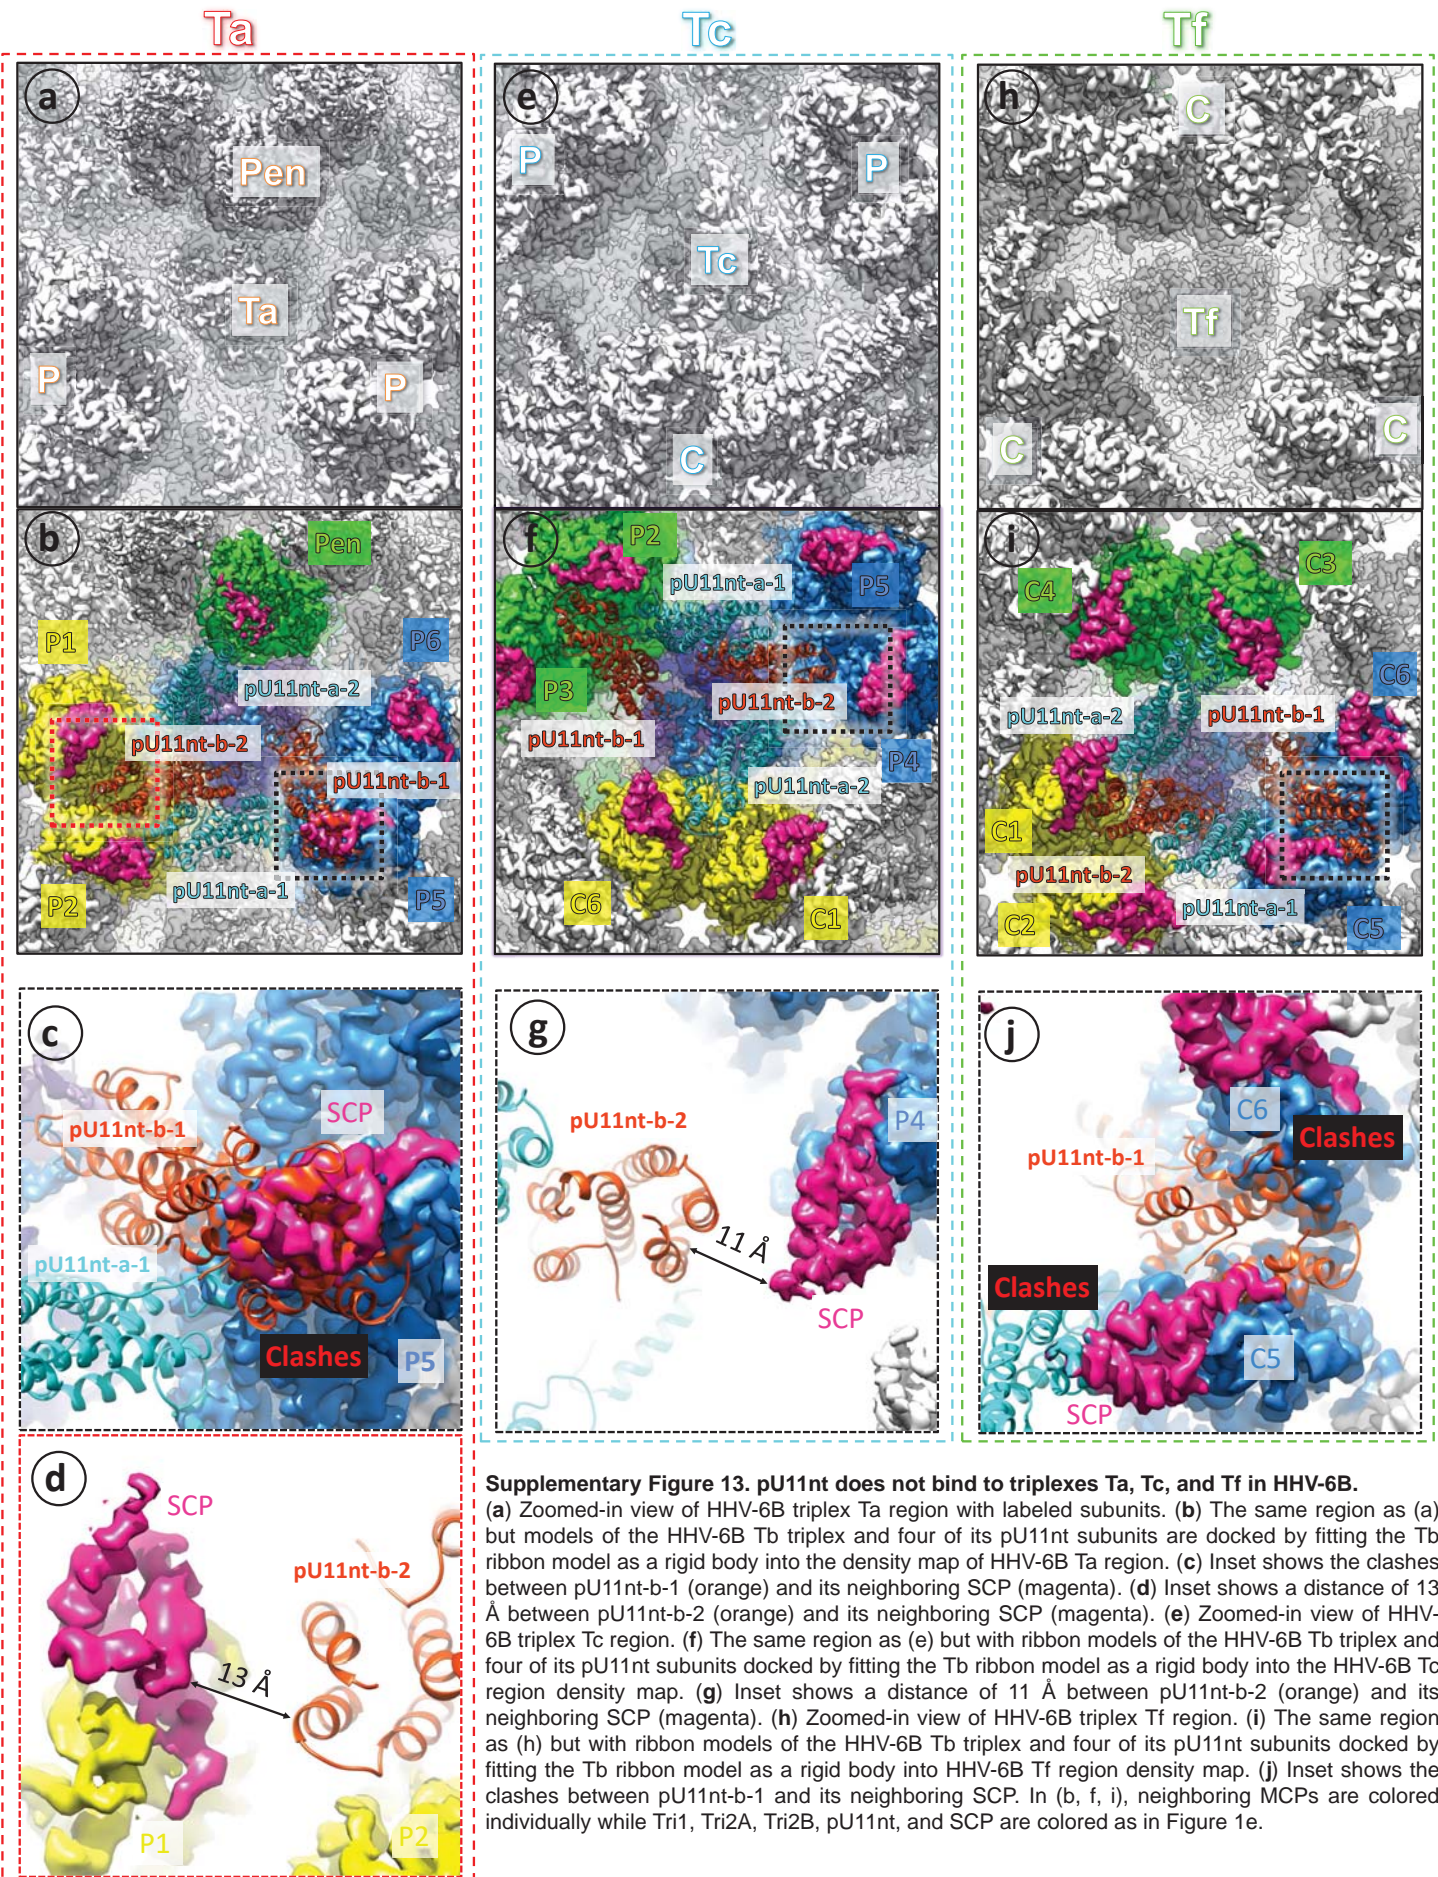

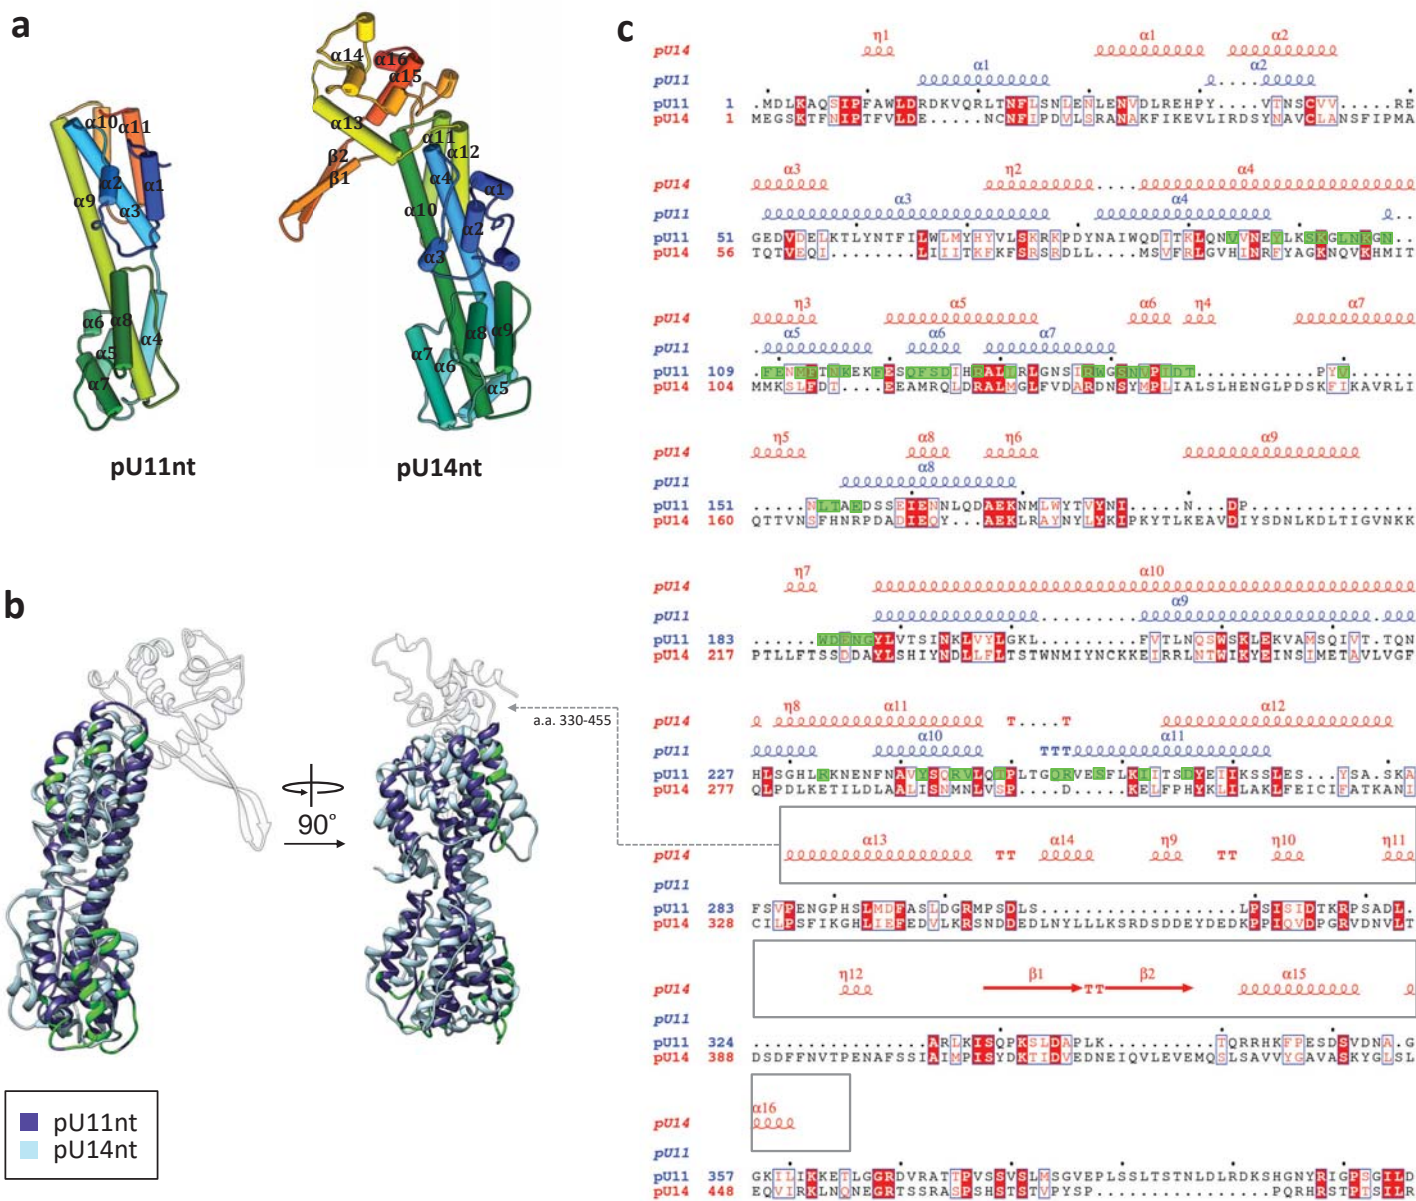

### Supplementary Figure 14. pU11 shares a similar fold with pU14.

(a) Atomic models of N-terminal domain of pU11 (pU11nt) and pU14 (pU14nt) proteins shown as pipes and planks (blue at the N-terminus to red at the C-terminus) with their  $\alpha$ -helices labeled. (b) Superposed pU11nt (dark blue) and pU14nt (light blue) reveal that pU11nt (a.a. 1-284) and pU14nt (a.a. 1-329) share a highly similar fold. Residues 330-455 are shown as transparency for clarity. pU11nt residues within a distance of 4 Å from neighboring capsid proteins are shown in green. (c) Secondary structure and sequence alignment for pU11nt and pU14nt. Those pU11nt residues that are within a distance of 4 Å from neighboring capsid proteins are highlighted in green shades.

## Supplementary Tables

**Supplementary Table 1. Data collection summarization for HHV-6B, HSV-1, HSV-2, HCMV, and KSHV.**

|                             | HSV-1              | HSV-2              | HSV-2 CVSC         | HCMV               | HHV-6B   | KSHV               |
|-----------------------------|--------------------|--------------------|--------------------|--------------------|----------|--------------------|
| Movie No.                   | 7,356              | 4,600              | 7,902              | 12,000             | 4,828    | 8,007              |
| Particle No.                | 45,530             | 55,000             | 50,000             | 39,600             | 6,443    | 44,343             |
| Pixel size (Å)              | 1.03               | 1.38               | 1.41               | 1.61               | 1.085    | 1.03               |
| Voltage (kV)                | 300                | 300                | 300                | 300                | 300      | 300                |
| Detector                    | K2                 | Falcon3            | Falcon3            | K2                 | K2       | K2                 |
| Data collection software    | Leginon            | SerialEM           | SerialEM           | Leginon            | SerialEM | Leginon            |
| Defocus range (μm)          | 1.0-3.0            | 0.8-2.3            | 0.8-2.3            | 2.0-2.5            | 2.2-3.2  | 1.0-3.0            |
| Icosahedral Resolution (Å)  | 4.2                | 4.0                | 4.2                | 3.9                | 5.1      | 4.2                |
| Sub-particle Resolution (Å) | 3.5                | 3.1                | 3.7                |                    | 3.8      |                    |
| Reference                   | Ref. <sup>18</sup> | Ref. <sup>19</sup> | Ref. <sup>20</sup> | Ref. <sup>16</sup> |          | Ref. <sup>17</sup> |

**Supplementary Table 2. CryoEM data collection, refinement and validation statistics for HHV-6B icosahedral and sub-particle (2-fold, 3-fold, and 5-fold) reconstructions, and atomic models.**

|                                                     | EMD-20557           | EMD-20558 | EMD-20560 | EMD-20559 |
|-----------------------------------------------------|---------------------|-----------|-----------|-----------|
|                                                     | Capsid              | 2-fold    | 3-fold    | 5-fold    |
| <b>Data collection and processing</b>               |                     |           |           |           |
| Magnification                                       | 64,000 (super mode) |           |           |           |
| Voltage (kV)                                        | 300                 |           |           |           |
| Electron exposure (e <sup>-</sup> /Å <sup>2</sup> ) | 23                  |           |           |           |
| Defocus range (μm)                                  | 2.2-3.2             |           |           |           |
| Pixel size (Å)                                      | 1.085               |           |           |           |
| Symmetry imposed                                    | Icosahedral         | C2        | C3        | C5        |
| Initial particle images (No.)                       | 7,430               |           |           |           |
| Final particle images (No.)                         | 6,443               | 196,290   | 128,860   | 77,316    |
| Map resolution (Å)                                  | 5.1                 | 3.77      | 3.77      | 3.82      |
| <b>Refinement</b>                                   |                     |           |           |           |
| Initial model used (PDB code)                       | N/A                 |           |           |           |
| Model resolution (Å)                                | N/A                 |           |           |           |
| Map sharpening B factor (Å <sup>2</sup> )           | 205                 | 120       | 120       | 120       |
| <b>Model validation (PDBID 6Q1F)</b>                |                     |           |           |           |
| <b>Model composition</b>                            |                     |           |           |           |
| Non-hydrogen atoms                                  | 238,592             |           |           |           |
| Protein residues                                    | 29,876              |           |           |           |
| Ligands                                             | 0                   |           |           |           |
| <b>R.M.S. deviations</b>                            |                     |           |           |           |
| Bond lengths (Å)                                    | 0.008               |           |           |           |
| Bond angles (°)                                     | 1.146               |           |           |           |
| <b>Validation</b>                                   |                     |           |           |           |
| MolProbity score                                    | 2.07                |           |           |           |
| Clash score                                         | 12.14               |           |           |           |
| Poor rotamers (%)                                   | 0.79                |           |           |           |
| <b>Ramachandran plot</b>                            |                     |           |           |           |
| Favored (%)                                         | 92.37               |           |           |           |
| Allowed (%)                                         | 7.32                |           |           |           |
| Disallowed (%)                                      | 0.31                |           |           |           |

**Supplementary Table 3. Comparison of capsid, pU11/pUL32, pU14/pUL25 proteins in HHV-6B and in HCMV.**

| Protein names     | Size (a.a.)         |                     | Sequence (%) |            |
|-------------------|---------------------|---------------------|--------------|------------|
|                   | HCMV (AD169 strain) | HHV-6B (Z29 strain) | Identity     | Similarity |
| <b>MCP</b>        | 1370                | 1345                | 43.9         | 67.0       |
| <b>SCP</b>        | 75                  | 89                  | 30.4         | 45.7       |
| <b>Tri1</b>       | 290                 | 299                 | 28.6         | 50.0       |
| <b>Tri2</b>       | 306                 | 296                 | 42.6         | 61.5       |
| <b>pUL32/pU11</b> | 1048                | 858                 | 14.9         | 25.1       |
| <b>pUL25/pU14</b> | 656                 | 610                 | 13.9         | 24.3       |



## Supplementary References

1. Kucukelbir, A., Sigworth, F.J. & Tagare, H.D. Quantifying the local resolution of cryo-EM density maps. *Nature Methods* **11**, 63 (2013).
2. Wang, B. et al. Crystal Structure of Human Herpesvirus 6B Tegument Protein U14. *PLOS Pathogens* **12**, e1005594 (2016).
3. Zhang, E. et al. Inherited Chromosomally Integrated Human Herpesvirus 6 Genomes Are Ancient, Intact, and Potentially Able To Reactivate from Telomeres. *Journal of Virology* **91**, e01137-01117 (2017).
4. Megaw, A.G., Rapaport, D., Avidor, B., Frenkel, N. & Davison, A.J. The DNA Sequence of the RK Strain of Human Herpesvirus 7. *Virology* **244**, 119-132 (1998).
5. Bradley, A.J. et al. High-throughput sequence analysis of variants of human cytomegalovirus strains Towne and AD169. *Journal of General Virology* **90**, 2375-2380 (2009).
6. Rawlinson, W.D., Farrell, H.E. & Barrell, B.G. Analysis of the complete DNA sequence of murine cytomegalovirus. *J Virol* **70**, 8833-8849 (1996).
7. Vink, C., Beuken, E. & Bruggeman, C.A. Complete DNA Sequence of the Rat Cytomegalovirus Genome. *Journal of Virology* **74**, 7656 (2000).
8. Davison, A.J. et al. The human cytomegalovirus genome revisited: comparison with the chimpanzee cytomegalovirus genome FN1. *Journal of General Virology* **84**, 17-28 (2003).
9. Baxter, M.K. & Gibson, W. Cytomegalovirus basic phosphoprotein (pUL32) binds to capsids in vitro through its amino one-third. *J Virol* **75**, 6865-6873 (2001).
10. Blewett, E.L., Sherrod, C.J., Texier, J.R., Conrad, T.M. & Dittmer, D.P. Complete Genome Sequences of *Mandrillus leucophaeus* and *Papio ursinus* Cytomegaloviruses. *Genome announcements* **3**, e00781-00715 (2015).
11. Hansen, S.G., Strelow, L.I., Franchi, D.C., Anders, D.G. & Wong, S.W. Complete Sequence and Genomic Analysis of Rhesus Cytomegalovirus. *Journal of Virology* **77**, 6620 (2003).
12. Davison, A.J. et al. Comparative genomics of primate cytomegaloviruses, Vol. 1. (2013).
13. Marsh, A.K. et al. Genomic Sequencing and Characterization of *Cynomolgus* Macaque Cytomegalovirus. *Journal of Virology* **85**, 12995 (2011).
14. Yang, D. et al. Complete genome sequence of pathogenic Guinea pig cytomegalovirus from salivary gland homogenates of infected animals. *Genome announcements* **1**, e0005413-e0005413 (2013).
15. Robert, X. & Gouet, P. Deciphering key features in protein structures with the new ENDscript server. *Nucleic Acids Research* **42**, W320-W324 (2014).
16. Yu, X., Jih, J., Jiang, J. & Zhou, Z.H. Atomic structure of the human cytomegalovirus capsid with its securing tegument layer of pp150. *Science* **356** (2017).
17. Dai, X. et al. Structure and mutagenesis reveal essential capsid protein interactions for KSHV replication. *Nature* **553**, 521 (2018).
18. Dai, X. & Zhou, Z.H. Structure of the herpes simplex virus 1 capsid with associated tegument protein complexes. *Science* **360** (2018).
19. Yuan, S. et al. Cryo-EM structure of a herpesvirus capsid at 3.1 Å. *Science* **360**, eaao7283 (2018).
20. Wang, J. et al. Structure of the herpes simplex virus type 2 C-capsid with capsid-vertex-specific component. *Nature Communications* **9**, 3668 (2018).
